# Supplementary material
Source: PubMed Central journal article supplement (PMC3892424)

Supporting Information – Table of Contents

|                                                          |            |
|----------------------------------------------------------|------------|
| <b>Materials and Methods .....</b>                       | <b>S2</b>  |
| <b>Complete Reference 4r from manuscript .....</b>       | <b>S2</b>  |
| <b>Experimental Procedures .....</b>                     | <b>S3</b>  |
| <b><sup>1</sup>H and <sup>2</sup>H NMR Spectra .....</b> | <b>S13</b> |
| <b><sup>13</sup>C NMR Spectra .....</b>                  | <b>S35</b> |

**Materials and Methods.** Unless stated otherwise, reactions were conducted in flame-dried glassware under an atmosphere of nitrogen using anhydrous solvents (either freshly distilled or passed through activated alumina columns). All commercially available reagents were used as received unless otherwise specified.  $\text{Mn}(\text{OAc})_3$  (dried *in vacuo* over  $\text{P}_2\text{O}_5$ ) and  $\text{LiAlD}_4$  were obtained from Acros.  $\text{AgOTf}$  and  $\text{CuBr}_2$  were obtained from Strem. Bathophenanthroline was obtained from Alfa Aesar. 2-Iodoxybenzoic acid (IBX)<sup>1</sup> and Dess–Martin periodinane<sup>2</sup> were prepared from known literature procedures. 1,4-dioxane was distilled from Na/benzophenone and stored in a Schlenk tube prior to use. Unless stated otherwise, reactions were performed at room temperature (RT, approximately 23 °C). Thin-layer chromatography (TLC) was conducted with EMD gel 60 F254 pre-coated plates (0.25 mm) and visualized using a combination of UV, anisaldehyde, iodine, and potassium permanganate staining. Silicycle silica gel 60 (particle size 0.040–0.063 mm) was used for flash column chromatography. <sup>1</sup>H NMR spectra were recorded on Bruker spectrometers (500 MHz). Data for <sup>1</sup>H spectra are reported as follows: chemical shift ( $\delta$  ppm), multiplicity, coupling constant (Hz), integration and are referenced to the residual solvent peak 7.26 ppm for  $\text{CDCl}_3$ , 5.32 ppm for  $\text{CD}_2\text{Cl}_2$ , 4.79 ppm for  $\text{D}_2\text{O}$ , and 1.94 ppm for  $\text{CD}_3\text{CN}$ . Data for <sup>2</sup>H NMR spectra are reported as follows: chemical shift ( $\delta$  ppm, at 77 MHz), multiplicity, coupling constant, integration and are referenced to the residual solvent peak 7.26 ppm for  $\text{CDCl}_3$ . <sup>13</sup>C NMR spectra are reported in terms of chemical shift (at 125 MHz) and are referenced to the residual solvent peak 118.26 ppm for  $\text{CD}_3\text{CN}$ , 77.16 ppm for  $\text{CDCl}_3$ , and 53.84 for  $\text{CD}_2\text{Cl}_2$ . IR spectra were recorded on a Perkin-Elmer 100 spectrometer and are reported in terms of frequency absorption ( $\text{cm}^{-1}$ ). Optical rotations were measured with a Rudolph Autopol III Automatic Polarimeter. Uncorrected melting points were measured using a Mel-Temp II melting point apparatus with a Fluke 50S thermocouple and a Digimelt MPA160 melting point apparatus. High resolution mass spectra were obtained from the UC Irvine Mass Spectrometry Facility.

#### Complete Reference 4r from manuscript:

D. B. Freeman, A. A. Holubec, M. W. Weiss, J. A. Dixon, A. Kafefuda, M. Ohtsuka, M. Inoue, R. G. Vaswani, H. Ohki, B. D. Doan, S. E. Reisman, B. M. Stoltz, J. J. Day, R. N. Tao, N. A. Dieterich, J. L. Wood, *Tetrahedron* **2010**, *66*, 6647–6655.

---

<sup>1</sup> M. Frigerio, M. Santagostino, S. Sputore, *J. Org. Chem.* **1999**, *64*, 4537–4538.

<sup>2</sup> C. Niu, T. Petterson, M. J. Miller, *J. Org. Chem.* **1996**, *61*, 1014–1022.

## Experimental Procedures.

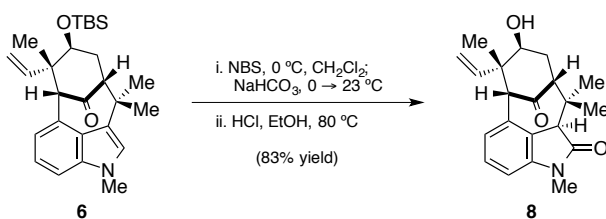

**Oxindole 8.** To a solution of indole **6**<sup>3</sup> (200 mg, 0.457 mmol, 1.0 equiv) in CH<sub>2</sub>Cl<sub>2</sub> (9.2 mL) at 0 °C was added NBS (82.0 mg, 0.462 mmol, 1.01 equiv) in one portion. The reaction vial was flushed with N<sub>2</sub>, and allowed to stir at 0 °C. After 15 min, solid NaHCO<sub>3</sub> (200 mg, 100 wt %) was added in one portion. The reaction was removed from the 0 °C bath and allowed to stir at room temperature for 5 min. The resulting suspension was evaporated under reduced pressure. Absolute ethanol (9.2 mL) and concentrated aqueous HCl (9.2 mL) were added. After heating to 80 °C for 17 h, the reaction was cooled to room temperature and transferred to a separatory funnel with H<sub>2</sub>O (15 mL) and EtOAc (15 mL). To the funnel was added solid NaHCO<sub>3</sub> until gas evolution was no longer observed. The resulting biphasic mixture was extracted with EtOAc (3 x 15 mL) and the organic layers were combined, dried over MgSO<sub>4</sub>, and evaporated under reduced pressure. The resulting residue was purified by flash chromatography (1:1:1 hexanes:CH<sub>2</sub>Cl<sub>2</sub>:Et<sub>2</sub>O) to afford oxindole **8** (130 mg, 83% yield) as a brown solid. Oxindole **8**: mp: 203.2 °C; R<sub>f</sub> 0.23 (1:1 hexanes:EtOAc); <sup>1</sup>H NMR (500 MHz, CDCl<sub>3</sub>): δ 7.22 (dd, *J* = 7.8, 7.7, 1H), 6.73 (d, *J* = 7.7, 1H), 6.67 (d, *J* = 7.8, 1H), 5.56 (dd, *J* = 17.5, 10.9, 1H), 5.22 (d, *J* = 10.9, 1H), 5.19 (d, *J* = 17.5, 1H), 4.22 (ddd, *J* = 12.2, 5.6, 2.8, 1H), 3.73 (s, 1H), 3.32 (d, *J* = 1.4, 1H), 3.19 (s, 3H), 2.59 (dd, *J* = 14.9, 5.6, 1H), 2.53 (d, *J* = 8.2, 1H), 2.07 (ddd, *J* = 14.9, 12.2, 8.2, 1H), 1.65 (s, 3H), 1.58 (d, *J* = 2.8, 1H), 1.17 (s, 3H), 0.68 (s, 3H); <sup>13</sup>C NMR (125 MHz, CDCl<sub>3</sub>, 20 of 21 observed): δ 208.3, 174.9, 144.8, 142.0, 130.7, 128.5, 127.2, 125.2, 116.6, 107.2, 68.4, 68.2, 62.2, 53.5, 50.1, 40.2, 30.0, 26.4, 26.3, 22.6; IR (film): 1703, 1687, 1611, 1588, 1461 cm<sup>-1</sup>; HRMS-ESI (*m/z*) [M + Na]<sup>+</sup> calcd for C<sub>21</sub>H<sub>25</sub>NO<sub>3</sub>Na, 362.1732; found 362.1737; [α]<sub>D</sub><sup>25.2</sup> +6.60° (*c* = 1.000, CHCl<sub>3</sub>).

<sup>3</sup> A. D. Hutters, K. W. Quasdorf, E. D. Styduhar, N. K. Garg, *J. Am. Chem. Soc.* **2011**, *133*, 15797–15799.

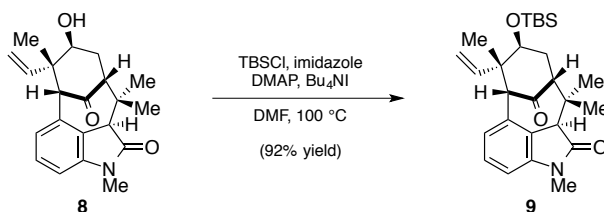

**Silyl ether 9.** To a solution of oxindole **8** (609 mg, 1.80 mmol, 1.0 equiv) in DMF (18.0 mL) was added imidazole (611 mg, 8.97 mmol, 5.0 equiv), DMAP (219 mg, 1.79 mmol, 1.0 equiv), and tetrabutylammonium iodide (663 mg, 1.79 mmol, 1.0 equiv). The resulting solution was stirred at room temperature for 5 min, and then TBSCl (809 mg, 5.37 mmol, 3.0 equiv) was added in one portion. The flask was fitted with a reflux condenser, flushed with N<sub>2</sub>, and then heated to 100 °C. After 25 h, the reaction mixture was cooled to room temperature and transferred to a separatory funnel with EtOAc (50 mL), H<sub>2</sub>O (20 mL), and a solution of saturated aqueous NH<sub>4</sub>Cl (20 mL). The resulting biphasic mixture was extracted with EtOAc (3 x 50 mL). The organic layers were combined, washed with H<sub>2</sub>O (3 x 50 mL), dried over MgSO<sub>4</sub>, and evaporated under reduced pressure. The resulting residue was purified by flash chromatography (9:1 hexanes:EtOAc) to afford silyl ether **9** (746 mg, 92% yield) as a white solid. Silyl ether **9**: mp: 184.5 °C; R<sub>f</sub> 0.64 (2:1 hexanes:EtOAc); <sup>1</sup>H NMR (500 MHz, CDCl<sub>3</sub>): δ 7.21 (dd, *J* = 7.9, 7.7, 1H), 6.73 (d, *J* = 7.7, 1H), 6.66 (d, *J* = 7.9, 1H), 5.40 (dd, *J* = 17.5, 10.8, 1H), 5.15–5.00 (m, 2H), 4.17 (dd, *J* = 11.6, 5.5, 1H), 3.62 (s, 1H), 3.26 (s, 1H), 3.21 (s, 3H), 2.47 (d, *J* = 8.2, 1H), 2.40 (dd, *J* = 15.1, 5.5, 1H), 2.10 (ddd, *J* = 15.1, 11.6, 8.2, 1H), 1.62 (s, 3H), 1.17 (s, 3H), 0.82 (s, 9H), 0.67 (s, 3H), 0.04 (s, 3H), -0.09 (s, 3H); <sup>13</sup>C NMR (125 MHz, CDCl<sub>3</sub>, 24 of 25 observed): δ 208.6, 175.0, 144.6, 143.6, 131.2, 128.4, 127.4, 124.9, 114.6, 107.1, 70.0, 69.2, 62.5, 53.7, 50.3, 40.1, 32.0, 26.4, 25.8, 22.4, 18.1, 16.1, -3.8, -4.4; IR (film): 1707, 1689, 1609, 1590, 1465 cm<sup>-1</sup>; HRMS-ESI (*m/z*) [M + Na]<sup>+</sup> calcd for C<sub>27</sub>H<sub>39</sub>NO<sub>3</sub>SiNa, 476.2597; found 476.2600; [α]<sub>D</sub><sup>26.1</sup> +12.60° (*c* = 1.000, CHCl<sub>3</sub>).

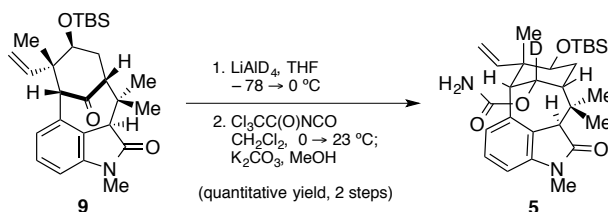

**Carbamate 5.** To a solution of silyl ether **9** (178 mg, 0.393 mmol, 1.0 equiv) in THF (13.0 mL) at -78 °C was added a solution of LiAlD<sub>4</sub> (1.0 M in THF, 1.18 mL, 1.18 mmol, 3.0 equiv) in a dropwise manner. After stirring at -78 °C for 20 min, the solution was then allowed to warm to 0 °C. After 20 min, the reaction was quenched at 0 °C with slow addition of a saturated aqueous solution of Rochelle's salt (10 mL), and then allowed to warm to 23 °C. The resulting biphasic mixture was stirred at room temperature for 1 h, transferred to a separatory funnel with EtOAc (25 mL) and H<sub>2</sub>O (20 mL), and extracted with EtOAc (3 x 25 mL). The organic layers were combined, dried

over  $\text{MgSO}_4$ , and evaporated under reduced pressure. The resulting residue was used in the subsequent step without further purification.

To a flask containing the crude residue from the previous step was added  $\text{CH}_2\text{Cl}_2$  (7.85 mL), cooled to 0 °C, followed by addition of trichloroacetyl isocyanate (58  $\mu\text{L}$ , 0.490 mmol, 1.25 equiv) in a dropwise manner. The resulting mixture was allowed to stir at 0 °C for 5 min, and then at room temperature for 20 min. The solvent was evaporated under reduced pressure. To the resulting residue was added MeOH (7.85 mL) followed by solid  $\text{K}_2\text{CO}_3$  (298 mg, 2.16 mmol, 5.5 equiv) in one portion. The reaction was flushed with  $\text{N}_2$  and left to stir at room temperature for 80 min. The reaction was quenched with saturated aqueous  $\text{NH}_4\text{Cl}$  (7 mL), and the resulting biphasic mixture was transferred to a separatory funnel with EtOAc (25 mL) and  $\text{H}_2\text{O}$  (20 mL). After extracting with EtOAc (3 x 25 mL), the organic layers were combined, dried over  $\text{MgSO}_4$ , and evaporated under reduced pressure. The resulting residue was purified by flash chromatography (2:1 hexanes:EtOAc) to afford carbamate **5** (203 mg, quant. yield, over two steps) as a white solid. Carbamate **5**: mp: 106.1 °C;  $R_f$  0.47 (1:1 hexanes:EtOAc);  $^1\text{H}$  NMR (500 MHz,  $\text{CDCl}_3$ ):  $\delta$  7.15 (ddd,  $J = 7.8, 7.7, 0.7$ , 1H), 6.70 (dd,  $J = 7.7, 0.7$ , 1H), 6.63 (d,  $J = 7.8$ , 1H), 5.23 (dd,  $J = 17.4, 10.7$ , 1H), 5.03 (dd,  $J = 17.4, 1.3$ , 1H), 4.93 (dd,  $J = 10.7, 1.3$ , 1H), 4.34 (s, 2H), 4.03 (dd,  $J = 12.5, 5.1$ , 1H), 3.60 (s, 1H), 3.20 (s, 3H), 2.83 (s, 1H) 2.30 (ddd,  $J = 15.0, 5.1, 1.9$ , 1H), 2.25 (d,  $J = 6.1$ , 1H), 1.98 (ddd,  $J = 15.0, 12.5, 6.1$ , 1H), 1.58 (s, 3H), 1.36 (s, 3H), 0.88 (s, 3H), 0.82 (s, 9H), 0.03 (s, 3H), -0.12 (s, 3H);  $^2\text{H}$  NMR (77 MHz,  $\text{CDCl}_3$ )  $\delta$  5.51 (br. s, 1D);  $^{13}\text{C}$  NMR (125 MHz,  $\text{CDCl}_3$ ):  $\delta$  175.8, 156.1, 146.3, 144.6, 138.1, 128.6, 127.4, 125.3, 113.7, 106.3, 74.5 (t,  $J_{\text{C-D}} = 22.1$ ), 70.9, 56.8, 55.9, 49.0, 48.9, 37.3, 32.4, 29.2, 26.3, 25.9, 24.3, 18.1, 17.1, -3.8, -4.3; IR (film): 2956, 2923, 2857, 1728, 1701, 1607, 1596, 1463  $\text{cm}^{-1}$ ; HRMS-ESI ( $m/z$ ) [ $\text{M} + \text{Na}$ ] $^+$  calcd for  $\text{C}_{28}\text{H}_{41}\text{N}_2\text{O}_4\text{SiDNa}$ , 522.2874; found 522.2872;  $[\alpha]_{\text{D}}^{26.5} +11.40^\circ$  ( $c = 1.000$ ,  $\text{CHCl}_3$ ).

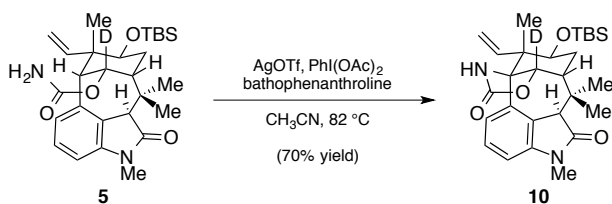

**Oxazolidinone 10.** A 1-dram vial containing  $\text{CH}_3\text{CN}$ , a second 1-dram vial charged with bathophenanthroline (10.6 mg, 0.0319 mmol, 0.5 equiv), and a third 1-dram vial containing carbamate **5** (33.0 mg, 0.0660 mmol, 1.0 equiv) and  $\text{PhI(OAc)}_2$  (42.5 mg, 0.132 mmol, 2.0 equiv) were transferred into the glovebox.  $\text{AgOTf}$  (8.5 mg, 0.033 mmol, 0.5 equiv) and  $\text{CH}_3\text{CN}$  (950  $\mu\text{L}$ ) were added to the vial containing the bathophenanthroline, and the resulting suspension was allowed to stir at room temperature for 20 min. Next,  $\text{CH}_3\text{CN}$  (950  $\mu\text{L}$ ) was added to the vial containing the carbamate, and the  $\text{AgOTf}$ /bathophenanthroline suspension was also added to this vial. The vial was then sealed, removed from the glovebox, and the resulting mixture was heated to 82 °C. After 24 h, the reaction was cooled to room temperature and filtered by passage over a plug of silica gel (EtOAc eluent, 10 mL). The filtrate was evaporated

under reduced pressure, and the resulting residue was purified by preparative thin layer chromatography (2:1 hexanes:EtOAc) to afford oxazolidinone **10** (23 mg, 70% yield) as a yellow solid and recovered silyl ether **9** (2 mg, 7% yield) as a white solid. Oxazolidinone **10**: mp: 288.0 °C (decomp.);  $R_f$  0.50 (1:1 hexanes:EtOAc);  $^1\text{H}$  NMR (500 MHz,  $\text{CDCl}_3$ ):  $\delta$  7.21 (app t,  $J = 8.0$ , 1H), 6.77–6.73 (m, 2H), 6.54 (s, 1H), 5.19–5.09 (m, 3H), 3.87 (dd,  $J = 11.7$ , 5.2, 1H), 3.47 (s, 1H), 3.22 (s, 3H), 2.44 (d,  $J = 6.7$ , 1H), 2.31 (dd,  $J = 15.2$ , 5.2, 1H), 2.01 (ddd,  $J = 15.2$ , 11.7, 6.7, 1H), 1.60 (s, 3H), 1.33 (s, 3H), 0.96 (s, 3H), 0.80 (s, 9H), 0.00 (s, 3H), -0.16 (s, 3H);  $^2\text{H}$  NMR (77 MHz,  $\text{CDCl}_3$ )  $\delta$  4.97 (br. s, 1D);  $^{13}\text{C}$  NMR (125 MHz,  $\text{CDCl}_3$ , 25 of 26 observed):  $\delta$  174.8, 159.1, 144.1, 144.0, 137.6, 128.0, 125.9, 124.7, 116.3, 107.4, 72.2, 69.9, 55.2, 49.9, 46.8, 37.7, 32.3, 28.0, 26.4, 25.8, 22.8, 18.1, 12.9, -3.8, -4.4; IR (film): 1758, 1708, 1691, 1607, 1590, 1461  $\text{cm}^{-1}$ ; HRMS-ESI ( $m/z$ )  $[\text{M} + \text{Na}]^+$  calcd for  $\text{C}_{28}\text{H}_{39}\text{N}_2\text{O}_4\text{SiDNa}$ , 520.2718; found 520.2719;  $[\alpha]_{\text{D}}^{27.0} +1.40^\circ$  ( $c = 1.000$ ,  $\text{CHCl}_3$ ).

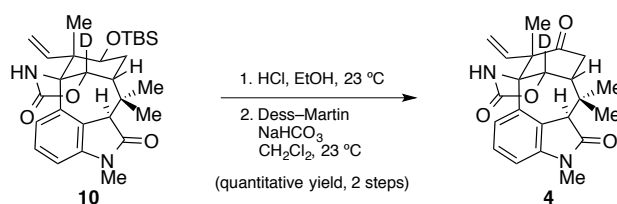

**Ketone 4.** A flask was charged with oxazolidinone **10** (576 mg, 1.16 mmol, 1.0 equiv), absolute ethanol (23.0 mL), and concentrated aqueous HCl (23.0 mL). After stirring at 23 °C for 1 h, the reaction mixture was transferred to a separatory funnel with  $\text{H}_2\text{O}$  (50 mL) and EtOAc (50 mL). To the funnel was added solid  $\text{NaHCO}_3$  until no more gas evolution was observed. The resulting biphasic mixture was extracted with EtOAc (3 x 50 mL) and the organic layers were combined, dried over  $\text{MgSO}_4$ , and evaporated under reduced pressure. The resulting residue was used in the subsequent step without further purification.

To a flask containing the crude product from the previous step was added solid  $\text{NaHCO}_3$  (487 mg, 5.80 mmol, 5.0 equiv) in one portion. The reaction vessel was flushed with  $\text{N}_2$ , and then  $\text{CH}_2\text{Cl}_2$  (11.6 mL) was added. To the resulting suspension was added the Dess–Martin periodinane reagent (645 mg, 1.52 mmol, 1.3 equiv) in one portion. The flask was flushed with  $\text{N}_2$ , and the reaction mixture was allowed to stir at room temperature. After 1 h, the reaction mixture was diluted with a 1:1 mixture of saturated aqueous  $\text{NaHCO}_3$  and saturated aqueous  $\text{Na}_2\text{S}_2\text{O}_3$  (10.0 mL). The resulting biphasic mixture was vigorously stirred until both layers appeared clear. The mixture was then transferred to a separatory funnel with EtOAc (30 mL) and  $\text{H}_2\text{O}$  (30 mL), and then extracted with EtOAc (3 x 30 mL). The organic layers were combined, dried over  $\text{MgSO}_4$ , and evaporated under reduced pressure. The resulting residue was purified by flash chromatography (1:1 hexanes:EtOAc) to afford ketone **4** (454 mg, quant. yield, over two steps) as a yellow solid. Ketone **4**: mp: 293.5 °C;  $R_f$  0.42 (1:3 hexanes:EtOAc);  $^1\text{H}$  NMR (500 MHz,  $\text{CDCl}_3$ ):  $\delta$  7.20 (app t,  $J = 8.0$ , 1H), 7.10 (s, 1H), 6.77–6.73 (m, 2H), 5.34 (dd,  $J = 17.6$ , 10.9, 1H), 5.22–5.16 (m, 2H), 3.34 (s, 1H), 3.18 (s, 3H), 3.17–3.06 (m, 2H), 2.86–2.82 (m, 1H), 1.62 (s, 3H), 1.56 (s, 3H), 0.92 (s, 3H);  $^2\text{H}$  NMR (77 MHz,  $\text{CDCl}_3$ )  $\delta$  5.45 (br. s, 1D);  $^{13}\text{C}$  NMR (125 MHz,  $\text{CDCl}_3$ , 21 of 22 observed):  $\delta$  209.8,

174.3, 159.3, 144.5, 137.9, 136.0, 128.5, 124.3, 123.4, 116.8, 108.0, 70.8, 57.4, 51.9, 48.2, 40.2, 38.4, 27.3, 26.5, 22.5, 19.8; IR (film): 1760, 1752, 1689, 1611, 1590  $\text{cm}^{-1}$ ; HRMS-ESI ( $m/z$ ) [ $M + \text{Na}$ ] $^+$  calcd for  $\text{C}_{22}\text{H}_{23}\text{N}_2\text{O}_4\text{DNa}$ , 404.1696; found 404.1700;  $[\alpha]_{\text{D}}^{27.3} -26.67^\circ$  ( $c = 0.870$ ,  $\text{CHCl}_3$ ).

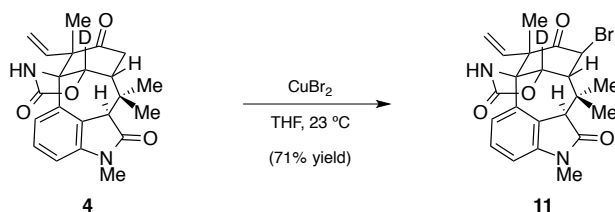

**Bromoketone 11.** A 1-dram vial was charged with ketone **4** (50.0 mg, 0.131 mmol, 1.0 equiv) and transferred into the glovebox.  $\text{CuBr}_2$  (59.0 mg, 0.264 mmol, 2.0 equiv) was then added and the vial was removed from the glovebox. THF (2.1 mL) was added and the reaction vial was sealed and left to stir at room temperature. After 19 h, the reaction mixture was filtered by passage over a plug of celite (THF eluent, 10 mL). The filtrate was collected in a test tube, diluted with  $\text{H}_2\text{O}$  (5 mL), and then extracted with  $\text{CHCl}_3$  (3 x 5 mL). The organic layers were combined, dried over  $\text{MgSO}_4$ , and evaporated under reduced pressure. The resulting residue was adsorbed onto silica gel (2 mL) and purified by flash chromatography (4:1 hexanes:acetone) to afford bromoketone **11** (42.5 mg, 71% yield) as a white solid. Bromoketone **11**: mp: 273.0 °C (decomp.);  $R_f$  0.62 (1:3 hexanes:EtOAc);  $^1\text{H}$  NMR (500 MHz,  $\text{CD}_3\text{CN}$ ):  $\delta$  7.32 (ddd,  $J = 8.2, 7.6, 0.8$ , 1H), 7.21 (s, 1H), 6.89–6.84 (m, 2H), 5.27–5.19 (m, 1H), 5.12–5.03 (m, 2H), 3.10 (s, 3H), 3.05 (s, 2H), 1.87 (s, 3H), 1.59 (s, 3H), 0.81 (s, 3H);  $^2\text{H}$  NMR (77 MHz,  $\text{CDCl}_3$ )  $\delta$  5.87 (br. s, 1D);  $^{13}\text{C}$  NMR (21 of 22 observed, 125 MHz,  $\text{CD}_3\text{CN}$ ):  $\delta$  204.9, 173.3, 157.4, 144.7, 138.3, 136.2, 128.4, 123.7, 122.8, 115.8, 108.0, 70.5, 58.2, 56.0, 50.4, 46.8, 38.7, 25.84, 25.75, 23.3, 21.5; IR (film): 1762, 1702, 1607, 1464  $\text{cm}^{-1}$ ; HRMS-ESI ( $m/z$ ) [ $M + \text{Na}$ ] $^+$  calcd for  $\text{C}_{22}\text{H}_{22}\text{O}_4\text{DN}_2\text{BrNa}$ , 484.0784; found 484.0809;  $[\alpha]_{\text{D}}^{25.8} +179.20^\circ$  ( $c = 1.000$ ,  $\text{CHCl}_3$ ).

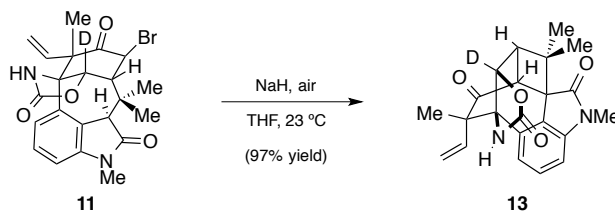

**Cyclobutane 13.** To a solution of bromoketone **11** (4.0 mg, 0.0087 mmol, 1.0 equiv) in THF (870  $\mu\text{L}$ ) was added NaH (60% dispersion in mineral oil, 1.7 mg, 0.043 mmol, 5.0 equiv) in one portion. The reaction vial was then opened to air for 10 seconds, sealed and left to stir at room temperature. After 2 h, the reaction mixture was filtered by passage over a plug of silica gel (EtOAc eluent, 6 mL). The filtrate was evaporated under reduced pressure, and the resulting residue was purified by flash chromatography (2:1

hexanes:EtOAc) to afford cyclobutane **13** (3.3 mg, 97% yield) as a white solid. Crystals suitable for X-ray diffraction studies (CCDC 960226) were obtained by concentration of **13** from a mixture of CHCl<sub>3</sub> and pentane. Cyclobutane **13**: mp: 284.0 °C; R<sub>f</sub> 0.51 (1:3 hexanes:EtOAc); <sup>1</sup>H NMR (500 MHz, CDCl<sub>3</sub>): δ 7.27 (app t, *J* = 8.0, 7.8, 1H), 6.88 (d, *J* = 8.0, 1H), 6.79 (d, *J* = 7.8, 1H), 6.42 (s, 1H), 5.09–5.02 (m, 2H), 4.90 (dd, *J* = 17.7, 10.8, 1H), 4.00 (d, *J* = 7.4, 1H), 3.17 (s, 3H), 3.09 (d, *J* = 7.4, 1H), 1.49 (s, 3H), 1.41 (s, 3H), 0.68 (s, 3H); <sup>2</sup>H NMR (77 MHz, CDCl<sub>3</sub>) δ 5.33 (br. s, 1D); <sup>13</sup>C NMR (125 MHz, CDCl<sub>3</sub>): δ 206.7, 172.3, 159.2, 142.9, 137.2, 135.5, 128.9, 124.6, 120.3, 117.4, 108.5, 80.4 (t, *J*<sub>C-D</sub> = 21.6), 69.3, 61.1, 57.4, 46.0, 45.3, 41.6, 26.7, 26.1, 21.1, 18.7; IR (film): 1758, 1710, 1607, 1469 cm<sup>-1</sup>; HRMS-ESI (*m/z*) [M + Na]<sup>+</sup> calcd for C<sub>22</sub>H<sub>21</sub>O<sub>4</sub>DN<sub>2</sub>Na, 402.1540; found 402.1540; [α]<sup>27.3</sup><sub>D</sub> -94.00° (*c* = 0.500, CHCl<sub>3</sub>).

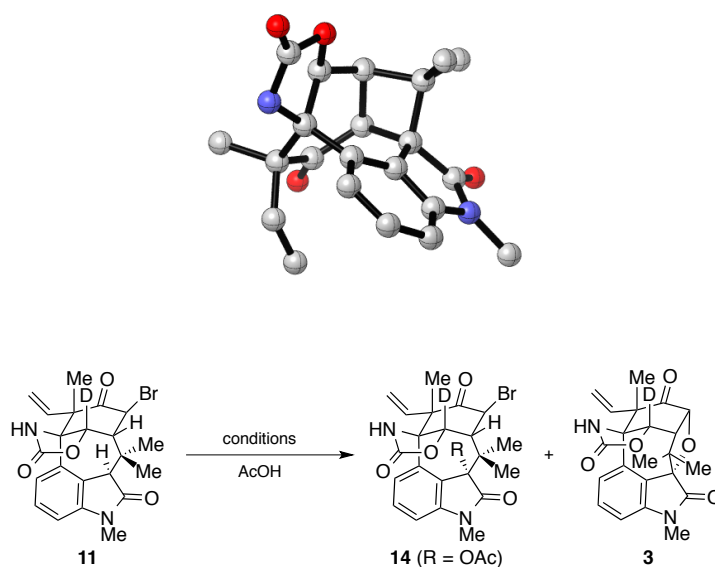

**General Procedure for Acetoxyoxindole 14 + Ether 3 From Table 1.** A 1-dram vial charged with bromoketone **11** (5.0 mg, 0.011 mmol, 1.0 equiv) was transferred into the glovebox. Mn(OAc)<sub>3</sub> was added and the vial was removed from the glovebox. AcOH (1.1 mL) was then added and the reaction vial was sealed and left to stir at the indicated temperature. For entries 1–2, after stirring for 24 h the reaction mixture was cooled to room temperature, transferred to a test tube with CHCl<sub>3</sub> (2 mL) and aqueous 2M HCl (1 mL), and then extracted with CHCl<sub>3</sub> (3 x 2 mL). The organic layers were combined, washed with saturated aqueous NaHCO<sub>3</sub> (2 x 2 mL), H<sub>2</sub>O (2 x 2 mL), and then dried over MgSO<sub>4</sub> and evaporated under reduced pressure. The resulting residue was purified by preparative thin layer chromatography (1:1 CHCl<sub>3</sub>:EtOAc) to afford acetoxyoxindole **14** and/or ether **3** as white solids. For entry 3, after stirring for 24 h the reaction mixture was cooled to room temperature and concentrated under reduced pressure. To the resulting residue was added a 1:1 mixture of MeOH:H<sub>2</sub>O (1.1 mL) and solid K<sub>2</sub>CO<sub>3</sub> (3.8 mg, 0.272 mmol, 25.0 equiv) in one portion. The reaction vial was flushed with N<sub>2</sub>, sealed and allowed to stir at 70 °C. After 19 h, the reaction mixture was cooled to room temperature, diluted with H<sub>2</sub>O (2 mL) and transferred to a test tube with CHCl<sub>3</sub> (2 mL). The resulting biphasic mixture was extracted with CHCl<sub>3</sub> (3 x 2 mL). The organic layers were



combined, dried over  $\text{MgSO}_4$ , and evaporated under reduced pressure. The resulting residue was purified by preparative thin layer chromatography (1:1  $\text{CHCl}_3$ :EtOAc) to afford ether **3** (2.4 mg, 56% yield) as a white solid. Acetoxyoxindole **14**: mp: 283.0 °C (decomp.);  $R_f$  0.65 (1:3 hexanes:EtOAc);  $^1\text{H}$  NMR (500 MHz,  $\text{CDCl}_3$ ):  $\delta$  7.31 (app t,  $J = 8.0$ , 1H), 6.94 (s, 1H), 6.80–6.76 (m, 2H), 5.37 (s, 1H), 5.31 (d,  $J = 17.0$ , 1H), 5.21 (d,  $J = 10.7$ , 1H), 5.01 (dd,  $J = 17.0$ , 10.7, 1 H), 3.20 (s, 3H), 3.04 (s, 1H), 1.91 (s, 3H), 1.88 (s, 3H), 1.64 (s, 3H), 1.02 (s, 3H);  $^2\text{H}$  NMR (77 MHz,  $\text{CDCl}_3$ )  $\delta$  5.87 (br. s, 1D);  $^{13}\text{C}$  NMR (23 of 24 observed, 125 MHz,  $\text{CDCl}_3$ ):  $\delta$  203.1, 171.4, 168.9, 158.4, 145.9, 137.3, 136.5, 131.0, 124.7, 122.6, 118.0, 108.2, 84.3, 70.4, 58.2, 56.3, 48.9, 41.2, 27.1, 25.3, 22.7, 22.6, 21.4; IR (film): 1762, 1732, 1712, 1611, 1597, 1463  $\text{cm}^{-1}$ ; HRMS-ESI ( $m/z$ )  $[\text{M} + \text{Na}]^+$  calcd for  $\text{C}_{24}\text{H}_{24}\text{O}_6\text{DN}_2\text{BrNa}$ , 540.0856; found 540.0858;  $[\alpha]^{26.9}_{\text{D}} -18.40^\circ$  ( $c = 1.000$ ,  $\text{CHCl}_3$ ). Ether **3**: mp: 317.0 °C (decomp.);  $R_f$  0.53 (1:3 hexanes:EtOAc);  $^1\text{H}$  NMR (500 MHz,  $\text{CDCl}_3$ ):  $\delta$  7.67 (s, 1H), 7.25 (app t,  $J = 7.9$ , 1H), 6.93 (dd,  $J = 7.9$ , 0.64, 1H), 6.81 (dd,  $J = 7.9$ , 0.64, 1H), 5.22 (dd,  $J = 17.2$ , 10.7, 1H), 4.96–4.89 (m, 2H), 4.78 (d,  $J = 10.7$ , 1H), 3.30 (d,  $J = 7.5$ , 1H), 3.23 (s, 3H), 1.45 (s, 3H), 1.42 (s, 3H), 1.02 (s, 3H);  $^2\text{H}$  NMR (77 MHz,  $\text{CDCl}_3$ )  $\delta$  4.69 (br. s, 1D);  $^{13}\text{C}$  NMR (125 MHz,  $\text{CDCl}_3$ ):  $\delta$  205.2, 171.9, 158.7, 142.8, 137.6, 136.3, 130.4, 126.6, 122.3, 116.4, 108.6, 88.8, 83.3, 81.4 (t,  $J_{\text{C-D}} = 22.6$ ), 70.2, 59.4, 51.4, 48.9, 26.9, 25.4, 21.2, 19.6; IR (film): 1774, 1724, 1710, 1605  $\text{cm}^{-1}$ ; HRMS-ESI ( $m/z$ )  $[\text{M} + \text{Na}]^+$  calcd for  $\text{C}_{22}\text{H}_{21}\text{O}_5\text{DN}_2\text{Na}$ , 418.1489; found 418.1476;  $[\alpha]^{21.3}_{\text{D}} -157.20^\circ$  ( $c = 1.000$ ,  $\text{CHCl}_3$ ).

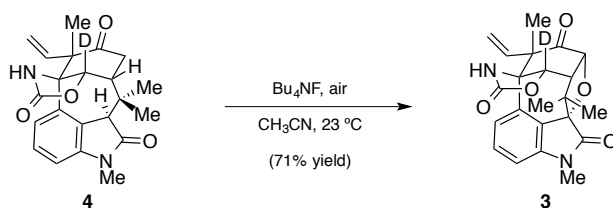

**Ether 3.** To a solution of ketone **4** (30 mg, 0.079 mmol, 1.0 equiv) in  $\text{CH}_3\text{CN}$  (7.9 mL) was added  $\text{Bu}_4\text{NF}$  (1.0 M in THF, 236  $\mu\text{L}$ , 0.236 mmol, 3.0 equiv) in a dropwise manner. The reaction mixture was stirred for 1 min, then opened to air for 30 seconds. The reaction vessel was sealed and left to stir at room temperature. After 2 h, the reaction was quenched with a solution of saturated aqueous  $\text{NH}_4\text{Cl}$  (5 mL). The resulting mixture was transferred to a separatory funnel with EtOAc (10 mL) and  $\text{H}_2\text{O}$  (10 mL). The resulting biphasic mixture was extracted with EtOAc (3 x 10 mL). The organic layers were combined, dried over  $\text{MgSO}_4$ , and evaporated under reduced pressure. The crude residue was purified by flash chromatography (1:1 hexanes:EtOAc) to afford ether **3** (22 mg, 71% yield) as a white solid.

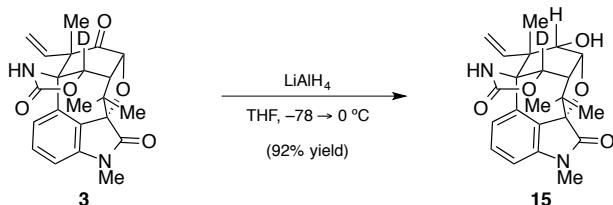

**Alcohol 15.** To a solution of ether **3** (9.4 mg, 0.024 mmol, 1.0 equiv) in THF (2.3 mL) at  $-78\text{ }^\circ\text{C}$  was added  $\text{LiAlH}_4$  (1.0 M in THF,  $24\ \mu\text{L}$ , 0.024 mmol, 1.0 equiv) in a dropwise manner. After 5 min, the reaction mixture was warmed to  $0\text{ }^\circ\text{C}$ . After 20 min, the reaction was quenched at  $0\text{ }^\circ\text{C}$  with slow addition of a saturated aqueous solution of Rochelle's salt (3.0 mL) and then allowed to warm to  $23\text{ }^\circ\text{C}$ . The mixture was stirred at room temperature for 30 min, and then transferred to a separatory funnel with EtOAc (10 mL) and  $\text{H}_2\text{O}$  (10 mL). The resulting biphasic mixture was extracted with EtOAc (3 x 10 mL). The organic layers were combined, dried over  $\text{MgSO}_4$ , and evaporated under reduced pressure. The resulting residue was purified by preparative thin layer chromatography (1:2  $\text{CHCl}_3$ :EtOAc) to afford alcohol **15** (8.7 mg, 92% yield) as a white solid. Alcohol **15**: mp:  $263.0\text{ }^\circ\text{C}$ ;  $R_f$  0.15 (1:3 hexanes:EtOAc);  $^1\text{H NMR}$  (500 MHz,  $\text{CDCl}_3$ ):  $\delta$  7.60 (s, 1H), 7.19 (app t,  $J = 7.9$ , 1H), 6.82 (d,  $J = 7.9$ , 1H), 6.77 (d,  $J = 7.9$ , 1H), 5.21 (dd,  $J = 17.4$ , 10.8, 1H), 5.09–5.03 (m, 2H), 4.94 (d,  $J = 10.8$ , 1H), 3.72 (dd,  $J = 11.1$ , 2.0, 1H), 3.22 (s, 3H), 3.02 (d,  $J = 7.5$ , 1H), 2.02 (d,  $J = 11.1$ , 1H), 1.43 (s, 3H), 1.41 (s, 3H), 0.94 (s, 3H);  $^2\text{H NMR}$  (77 MHz,  $\text{CDCl}_3$ )  $\delta$  4.79 (br. s, 1D);  $^{13}\text{C NMR}$  (21 of 22 observed, 125 MHz,  $\text{CDCl}_3$ ):  $\delta$  173.0, 159.4, 142.4, 139.0, 136.4, 130.2, 126.9, 122.4, 117.9, 108.2, 87.3, 82.0, 76.1, 70.9, 49.2, 48.7, 48.3, 26.8, 25.6, 21.3, 19.6; IR (film): 1752, 1722, 1603, 1462  $\text{cm}^{-1}$ ; HRMS-ESI ( $m/z$ )  $[\text{M} + \text{Na}]^+$  calcd for  $\text{C}_{22}\text{H}_{23}\text{O}_5\text{DN}_2\text{Na}$ , 420.1646; found 420.1631;  $[\alpha]_D^{24.1} -49.20^\circ$  ( $c = 1.000$ ,  $\text{CHCl}_3$ ).

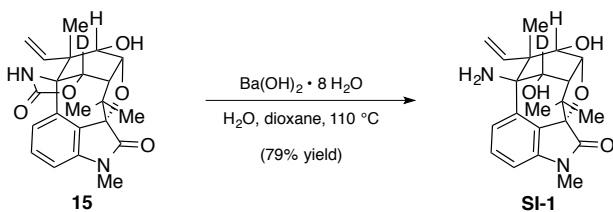

**SI-1.** A Schlenk tube was charged with alcohol **15** (7.30 mg, 0.0184 mmol, 1.0 equiv) and  $\text{Ba(OH)}_2 \cdot 8\text{H}_2\text{O}$  (46.3 mg, 0.147 mmol, 8.0 equiv). The reaction vessel was then evacuated and backfilled with  $\text{N}_2$  three times. A 2:1 mixture of 1,4-dioxane: $\text{H}_2\text{O}$  ( $634\ \mu\text{L}$ ) that had been taken through six freeze-pump-thaw cycles prior to use was then added to the Schlenk tube. The vessel was then sealed and allowed to stir at  $110\text{ }^\circ\text{C}$ . After 21 h, the contents of the Schlenk tube were transferred to a separatory funnel with EtOAc (5 mL) and  $\text{H}_2\text{O}$  (5 mL). The resulting biphasic mixture was extracted with EtOAc (3 x 5 mL). The organic layers were combined, dried over  $\text{Na}_2\text{SO}_4$ , and evaporated under reduced pressure. The resulting residue was purified by preparative thin layer chromatography (3:1  $\text{CHCl}_3$ :MeOH) to afford **SI-1** (5.4 mg, 79% yield) as a white solid. **SI-1**:  $R_f$  0.12 (9:1  $\text{CHCl}_3$ :MeOH);  $^1\text{H NMR}$  (500 MHz,  $\text{D}_2\text{O}$ , 22 of 25 observed):  $\delta$  7.37 (app t,  $J = 8.3$ , 1H),

7.18 (d,  $J = 8.3$ , 1H), 7.02 (d,  $J = 8.2$ , 1H), 5.50 (dd,  $J = 17.6$ , 11.0, 1H), 4.96 (dd,  $J = 7.3$ , 1.8, 1 H), 4.92 (d,  $J = 17.6$ , 1H), 3.88 (d,  $J = 1.8$ , 1H), 3.23 (s, 3H), 2.83 (d,  $J = 7.3$ , 1H), 1.91 (s, 2H), 1.37 (s, 3H), 1.28 (s, 3H), 0.85 (s, 3H).

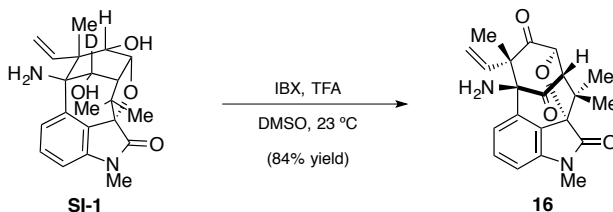

**Aminodiketone 16.** To a solution of **SI-1** (5.4 mg, 0.014 mmol, 1.0 equiv) in DMSO (500  $\mu\text{L}$ ) was added TFA (1.2  $\mu\text{L}$ , 0.016 mmol, 1.10 equiv). The mixture was stirred at room temperature. After 5 min, IBX (20.4 mg, 0.0728 mmol, 5.0 equiv) was added in one portion and the vial was flushed with  $\text{N}_2$ . After stirring at room temperature for 20 h, the reaction mixture transferred to a separatory funnel with a solution of aqueous  $\text{K}_2\text{CO}_3$  (5 mL, concentration of 50 mg/mL) and EtOAc (5 mL). The resulting biphasic mixture was extracted with EtOAc (3 x 5 mL) and the organic layers were combined, dried over  $\text{Na}_2\text{SO}_4$ , and evaporated under reduced pressure. The resulting residue was purified by preparative thin layer chromatography (9:1  $\text{CHCl}_3$ :MeOH) to afford aminodiketone **16** (4.5 mg, 84% yield) as a white solid. Aminodiketone **16**: mp: 190–191  $^\circ\text{C}$ ;  $R_f$  0.73 (9:1  $\text{CH}_3\text{Cl}$ :MeOH);  $^1\text{H}$  NMR (500 MHz,  $\text{CDCl}_3$ ):  $\delta$  7.35 (dd,  $J = 8.2$ , 7.6, 1H), 7.29 (dd,  $J = 8.2$ , 1.0, 1H), 6.80 (dd,  $J = 7.6$ , 1.0, 1H), 5.64 (dd,  $J = 17.4$ , 10.7, 1H), 5.40 (d,  $J = 10.7$ , 1 H), 5.21 (d,  $J = 17.4$ , 1H), 4.93 (d,  $J = 7.6$ , 1H), 3.49 (d,  $J = 7.6$ , 1H), 3.20 (s, 3H), 2.04 (br. s, 2H), 1.59 (s, 3H), 1.19 (s, 3H), 0.78 (s, 3H);  $^{13}\text{C}$  NMR (21 of 22 observed, 125 MHz,  $\text{CDCl}_3$ ):  $\delta$  204.9, 204.4, 170.2, 143.6, 134.8, 134.8, 130.3, 125.8, 124.2, 118.9, 108.9, 86.5, 79.4, 69.4, 62.5, 62.1, 52.4, 26.9, 25.3, 20.0, 17.6; IR (film): 1718, 1609, 1582, 1459, 1366  $\text{cm}^{-1}$ ; HRMS-ESI ( $m/z$ ) [ $\text{M} + \text{Na}$ ] $^+$  calcd for  $\text{C}_{21}\text{H}_{22}\text{O}_4\text{DN}_2\text{Na}$ , 389.1477; found 389.1469;  $[\alpha]_D^{22.9} +29.20^\circ$  ( $c = 1.000$ ,  $\text{CHCl}_3$ ).

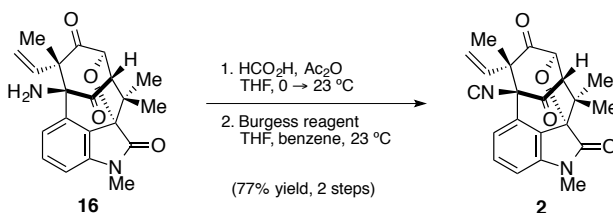

**(+)-*N*-Methylwelwitindolinone D Isonitrile (2).** A 1-dram vial was charged with 96% formic acid (0.100 mL) and acetic anhydride (0.100 mL). The resulting mixture was stirred at 60  $^\circ\text{C}$  for 1 h. The reaction vessel was cooled to room temperature and 39  $\mu\text{L}$  of the 96% formic acid/acetic anhydride mixture was added to a solution of aminodiketone **16** (4.2 mg, 0.010 mmol, 1.0 equiv) in THF (765  $\mu\text{L}$ ) at 0  $^\circ\text{C}$ . The reaction was then warmed to room temperature. After 2 h, the reaction mixture was transferred to a test tube with EtOAc (2 mL) and a solution of saturated aqueous  $\text{NaHCO}_3$  (1 mL). The

resulting biphasic mixture was extracted with EtOAc (4 x 2 mL). The organic layers were combined, dried over MgSO<sub>4</sub>, and evaporated under reduced pressure to afford the crude product, which was used directly in the subsequent reaction.

To a vial containing the crude product from the previous step was added THF (600  $\mu$ L) and benzene (600  $\mu$ L), followed by Burgess reagent (3.5 mg, 0.011 mmol, 1.0 equiv). The vial was flushed with N<sub>2</sub> and allowed to stir at room temperature for 40 min. An additional amount of Burgess reagent (3.5 mg, 0.015 mol, 1.0 equiv) was then added, and the reaction was allowed to stir at room temperature for 10 min. The reaction was then filtered by passage over a plug of silica gel (EtOAc eluent, 10 mL). The filtrate was evaporated under reduced pressure, and the resulting residue was purified by preparative thin layer chromatography (1:1 hexanes:EtOAc) to afford (+)-**2** (3.3 mg, 77% yield, 2 steps) as a white solid. Spectral data for <sup>1</sup>H NMR, <sup>13</sup>C NMR, and IR for synthetic **2** was consistent with literature reports.<sup>4</sup> (+)-*N*-Methylwelwitindolinone D isonitrile (**2**): mp: 156 °C; R<sub>f</sub> 0.50 (1:1 hexanes:EtOAc); <sup>1</sup>H NMR (500 MHz, CD<sub>2</sub>Cl<sub>2</sub>):  $\delta$  7.45 (dd, *J* = 8.3, 7.9, 1H), 7.29 (dd, *J* = 8.3, 0.7, 1H), 6.93 (dd, *J* = 7.9, 0.7, 1H), 5.48 (dd, *J* = 16.3, 10.6, 1H), 5.43 (dd, *J* = 10.6, 1.5, 1H), 5.35 (dd, *J* = 16.3, 1.5, 1H), 4.92 (d, *J* = 7.5, 1H), 3.57 (d, *J* = 7.5, 1H), 3.19 (s, 3H), 1.55 (s, 3H), 1.39 (s, 3H), 0.80 (s, 3H); <sup>13</sup>C NMR (125 MHz, CD<sub>2</sub>Cl<sub>2</sub>):  $\delta$  201.3, 192.8, 169.9, 165.5, 144.4, 133.0, 131.4, 126.8, 125.8, 124.0, 120.6, 110.5, 86.7, 81.1, 79.7, 62.0, 61.7, 53.6, 27.1, 25.0, 20.1, 19.8; IR (film): 2980, 2940, 2139, 1730, 1609, 1592, 1463, 1366, 1344 cm<sup>-1</sup>; HRMS-ESI (*m/z*) [M + Na]<sup>+</sup> calcd for C<sub>22</sub>H<sub>20</sub>N<sub>2</sub>O<sub>4</sub>Na, 399.1321; found 399.1322; [ $\alpha$ ]<sub>D</sub><sup>22.3</sup> +4.30° (*c* = 0.37, CH<sub>2</sub>Cl<sub>2</sub>). Note: This specific rotation differs from that reported for the natural product ([ $\alpha$ ]<sub>D</sub> -30°, *c* = 0.37, CH<sub>2</sub>Cl<sub>2</sub>). This is most likely due to a tabulation error in the isolation report as: (a) the synthesis begins with (*S*)-carvone >96%+ ee, (b) the specific rotation of bicycle **6** in this synthesis is consistent with that of material used in previous syntheses of welwitindolinones,<sup>3,5c</sup> and (c) our specific rotation data has given consistent results across a range of samples and concentrations. Although the sign of rotation differs, the compound we have prepared is assumed to be the natural occurring enantiomer due to its biosynthetic relationship to the *N*-methylwelwitindolinone C series of natural products, whose absolute configuration have previously been established.<sup>3,5</sup>

<sup>4</sup> J. L. Jimenez, U. Huber, R. E. Moore, G. M. L. Patterson, *J. Nat. Prod.* **1999**, *62*, 569–572.

<sup>5</sup> a) V. Bhat, K. M. Allan, V. H. Rawal, *J. Am. Chem. Soc.* **2011**, *133*, 5798–5801; b) K. W. Allan, K. Kobayashi, V. H. Rawal, *J. Am. Chem. Soc.* **2012**, *134*, 1392–1395; c) K. W. Quasdorf, A. D. Hutters, M. W. Lodewyk, D. J. Tantillo, N. K. Garg, *J. Am. Chem. Soc.* **2012**, *134*, 1396–1399.

**$^1\text{H}$  and  $^2\text{H}$  NMR Spectra:**

Current Data Parameters  
 NAME ES4\_055  
 EXPNO 2  
 PROCNO 1  
 F2 - Acquisition Parameters  
 Date\_ 20130312  
 Time 13:11  
 INSTRUM dx500  
 PROBHD 5 mm bb-Z800  
 PULPROG zg30  
 TD 65536  
 SOLVENT CDCl3  
 NS 4  
 DS 0  
 SWH 1000.000 Hz  
 FIDRES 0.152588 Hz  
 AQ 3.2769001 sec  
 RG 143.7  
 DW 50.000 usec  
 DE 6.00 usec  
 TE 297.1 K  
 D1 2.0000000 sec  
 TD0 1

===== CHANNEL f1 =====  
 NUC1 1H  
 P1 13.30 usec  
 PL1 0.00 dB  
 SFO1 500.3330020 MHz

F2 - Processing parameters  
 SI 32768  
 SF 500.3300222 MHz  
 WDW EM  
 SSB 0  
 LB 0.30 Hz  
 GB 0  
 PC 1.00

Purified Product, 1H NMR

7.260  
7.234  
7.233  
7.218  
7.217  
7.203  
7.201  
6.733  
6.718  
6.677  
6.662  
5.584  
5.562  
5.549  
5.527  
5.232  
5.231  
5.211  
5.209  
5.204  
5.202  
5.169  
5.168  
4.243  
4.237  
4.232  
4.226  
4.218  
4.213  
4.207  
4.202  
3.730  
3.323  
3.319  
3.188  
2.607  
2.596  
2.578  
2.566  
2.541  
2.524  
2.104  
2.088  
2.080  
2.074  
2.063  
2.058  
2.050  
2.033  
1.647  
1.584  
1.579

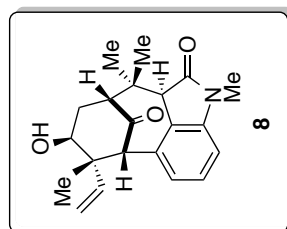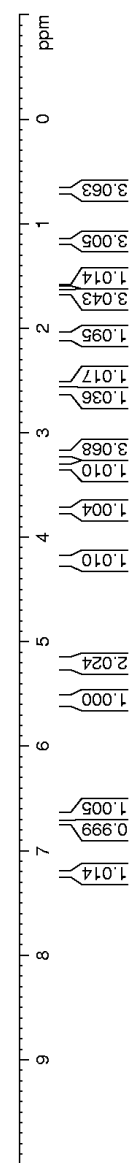

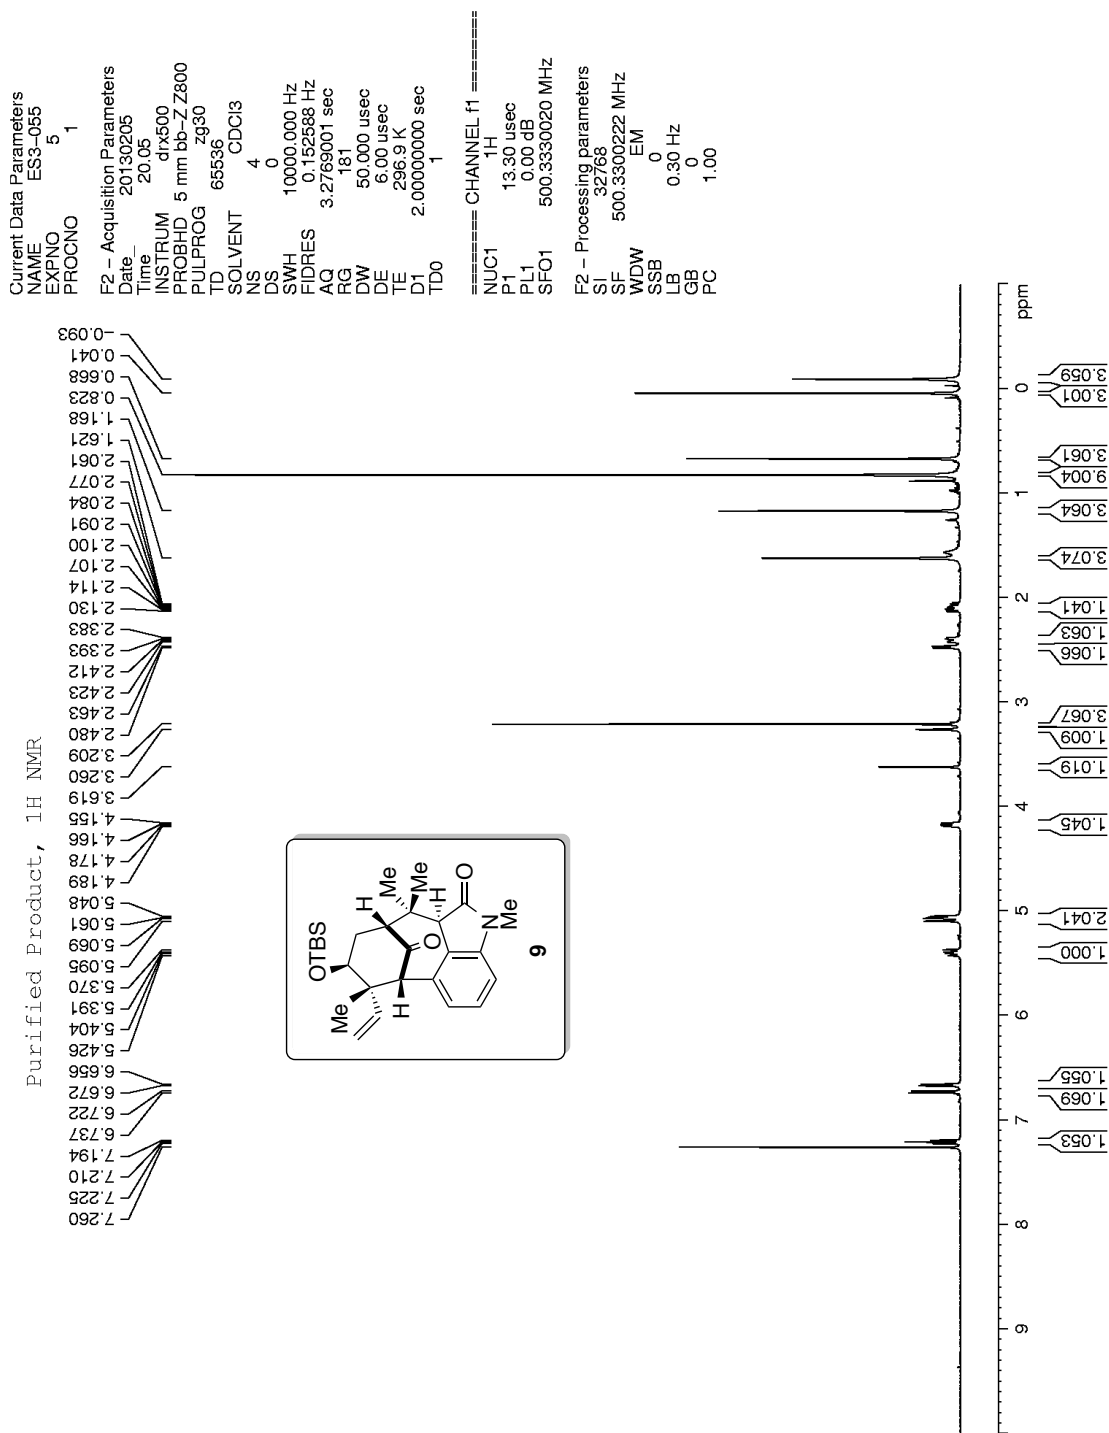

Purified Product, <sup>1</sup>H NMR

Current Data Parameters  
 NAME NAW-1-088p  
 EXPNO 3  
 PROCNO 1

F2 - Acquisition Parameters  
 Date 20130128  
 Time 16:19  
 INSTRUM av500  
 PROBHD 5 mm DCH 13C-1  
 PULPROG zg30  
 TD 65536  
 SOLVENT CDCl3  
 NS 8  
 DS 0  
 SWH 1000.000 Hz  
 FIDRES 0.152588 Hz  
 AQ 3.2768500 sec  
 RG 11  
 DW 50.000 usec  
 DE 10.00 usec  
 TE 298.0 K  
 D1 2.00000000 sec  
 TD0 1

==== CHANNEL f1 =====  
 NUC1 1H  
 P1 10.00 usec

F2 - Processing parameters  
 SI 65536  
 SF 500.1300138 MHz  
 WDW EM  
 SSB 0  
 LB 0.30 Hz  
 GB 0  
 PC 1.00

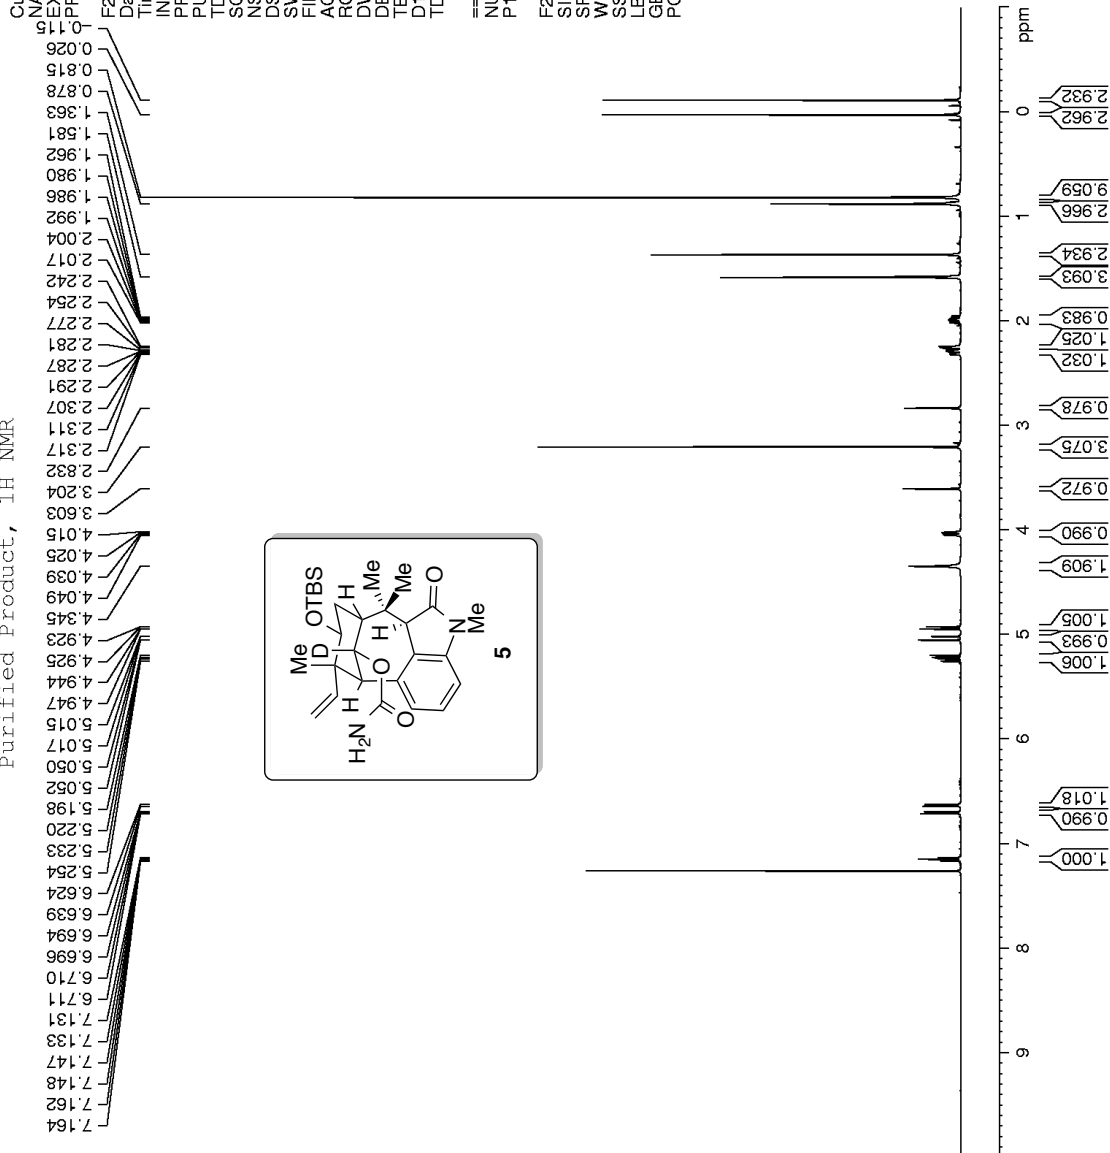



Purified Product, <sup>2</sup>H NMR

Current Data Parameters  
 NAME ES4-114  
 EXPNO 10  
 PROCNO 1

F2 - Acquisition Parameters  
 Date\_ 20130610  
 Time\_ 18.25  
 INSTRUM av500  
 PROBHD 5 mm DCH 13C-1  
 PULPROG zgpg2h.2  
 TD 13820  
 SOLVENT CDCl3  
 NS 11  
 DS 0  
 SWH 1535.627 Hz  
 FIDRES 0.111116 Hz  
 AQ 4.4998422 sec  
 RG 2.75  
 DW 325.600 usec  
 DE 18.00 usec  
 TE 300.0 K  
 D1 2.00000000 sec  
 D11 0.03000000 sec  
 TDO 1

==== CHANNEL f1 =====  
 SFO1 76.7734606 MHz  
 NUC1 2H  
 P1 225.00 usec

F2 - Processing parameters  
 SI 65536  
 SF 76.7729983 MHz  
 WDW EM  
 SSB 0  
 LB 0.30 Hz  
 GB 0  
 PC 1.00

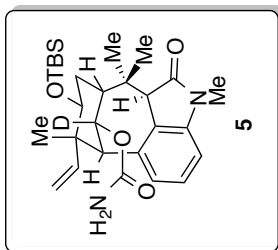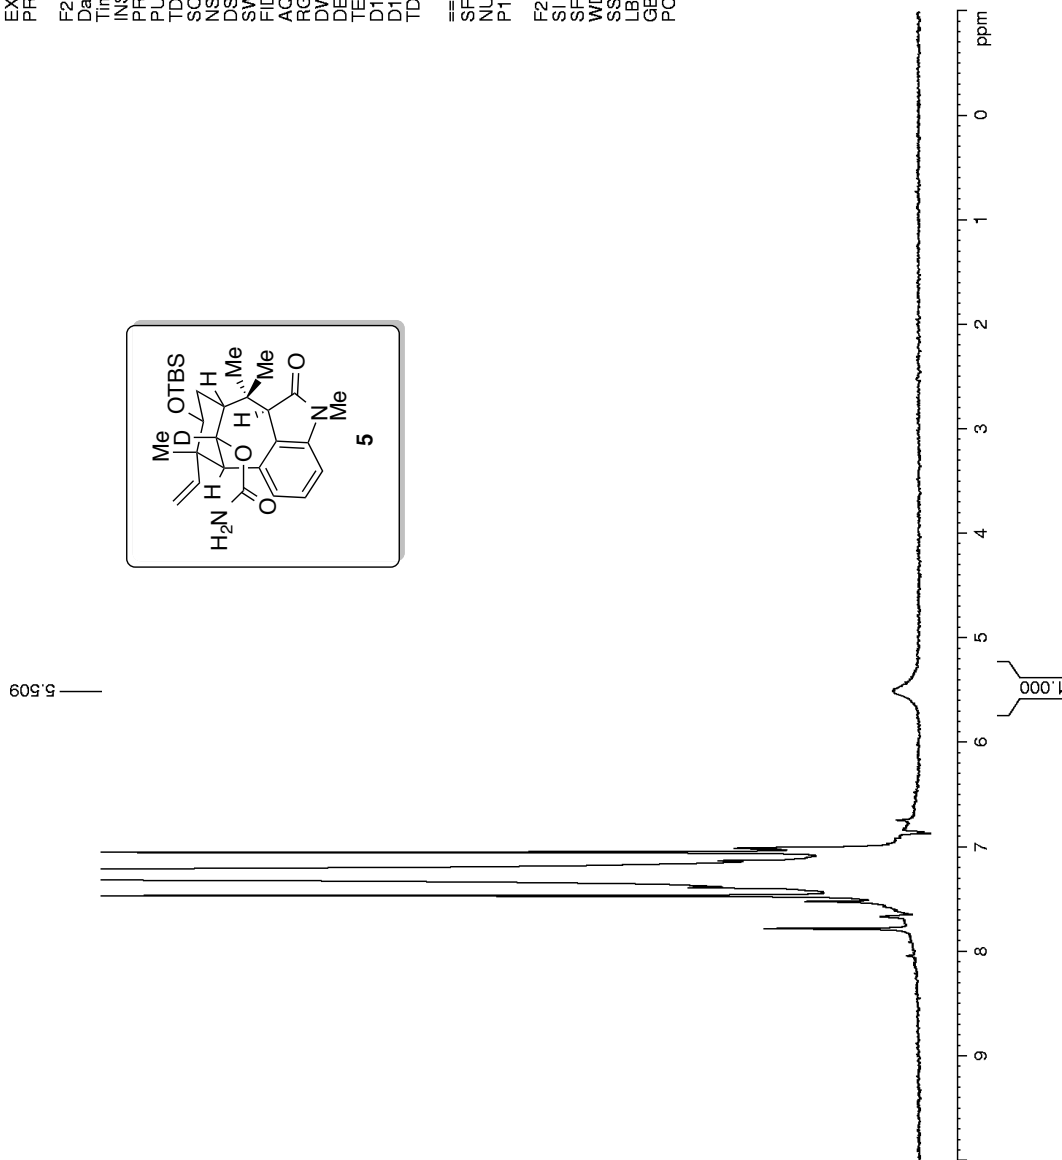

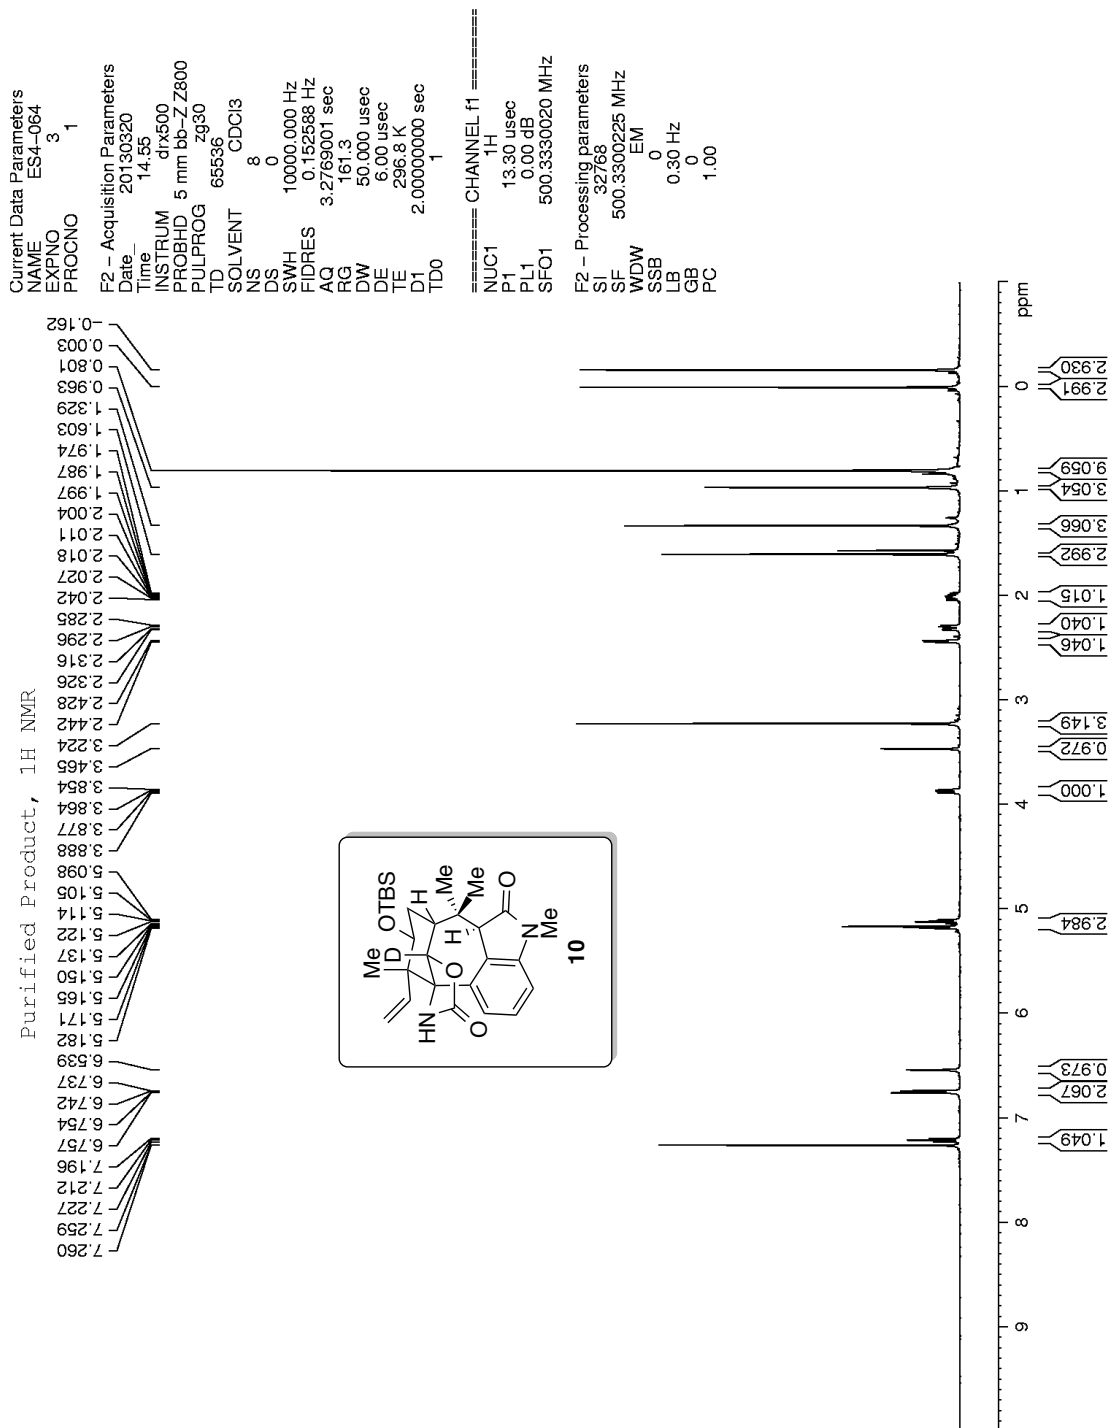

Purified Product, 2H NMR

Current Data Parameters  
 NAME ES4-064  
 EXPNO 10  
 PROCNO 1

F2 - Acquisition Parameters  
 Date\_ 20130610  
 Time\_ 18.13  
 INSTRUM av500  
 PROBHD 5 mm DCH 13C-1  
 PULPROG zgpg30  
 TD 13820  
 SOLVENT CDCl3  
 NS 37  
 DS 0  
 SWH 1535.627 Hz  
 FIDRES 0.111116 Hz  
 AQ 4.4998422 sec  
 RG 2.75  
 DW 325.600 usec  
 DE 18.00 usec  
 TE 300.0 K  
 D1 2.0000000 sec  
 D11 0.0300000 sec  
 TDO 1

==== CHANNEL f1 =====  
 SFO1 76.7734606 MHz  
 NUC1 2H  
 P1 225.00 usec

F2 - Processing parameters  
 SI 65536  
 SF 76.7729985 MHz  
 WDW EM  
 SSB 0  
 LB 0.30 Hz  
 GB 0  
 PC 1.00

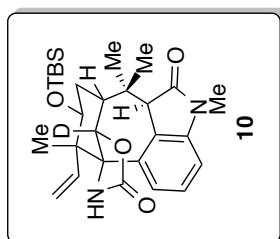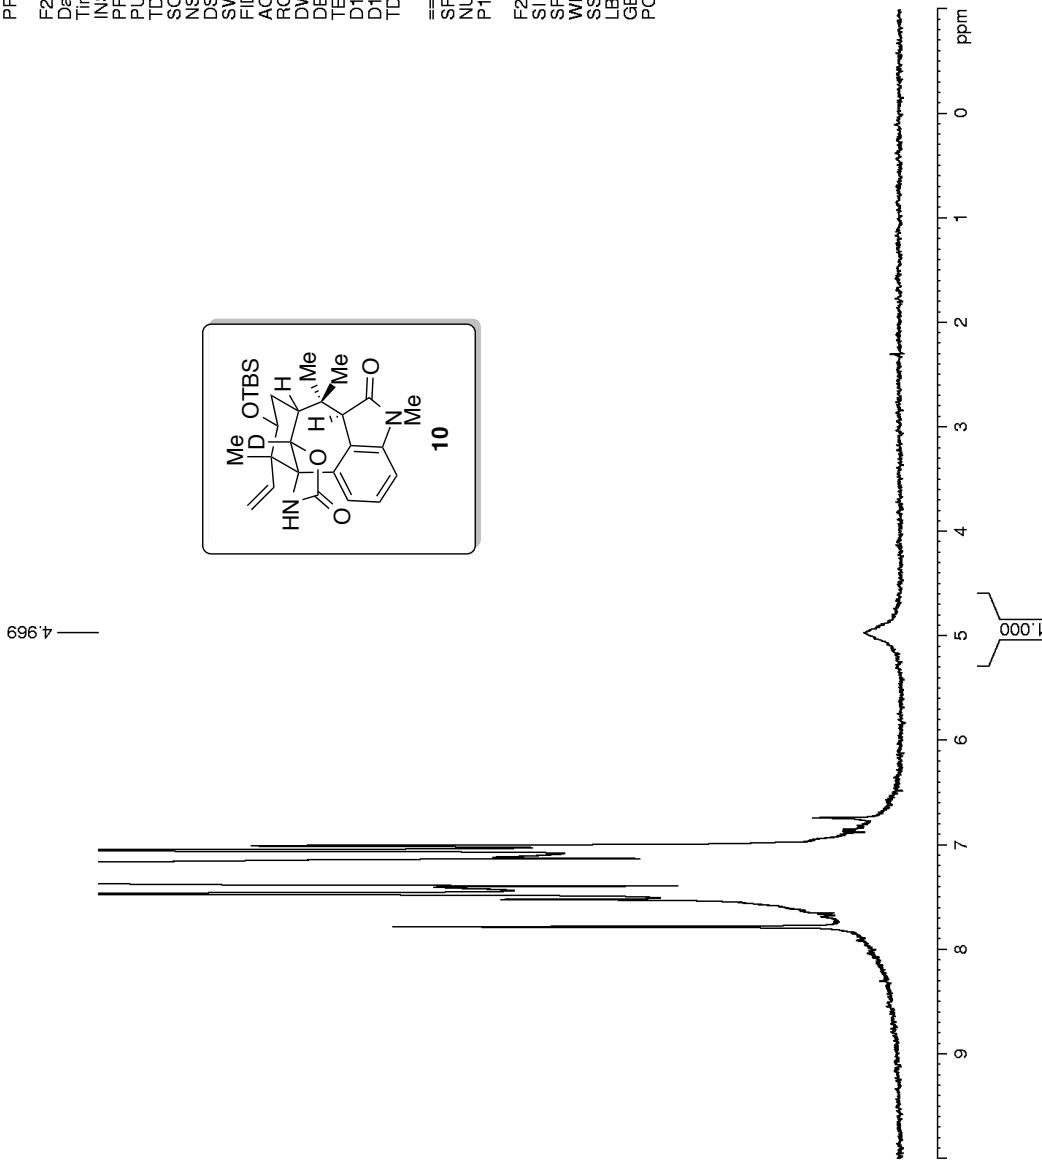

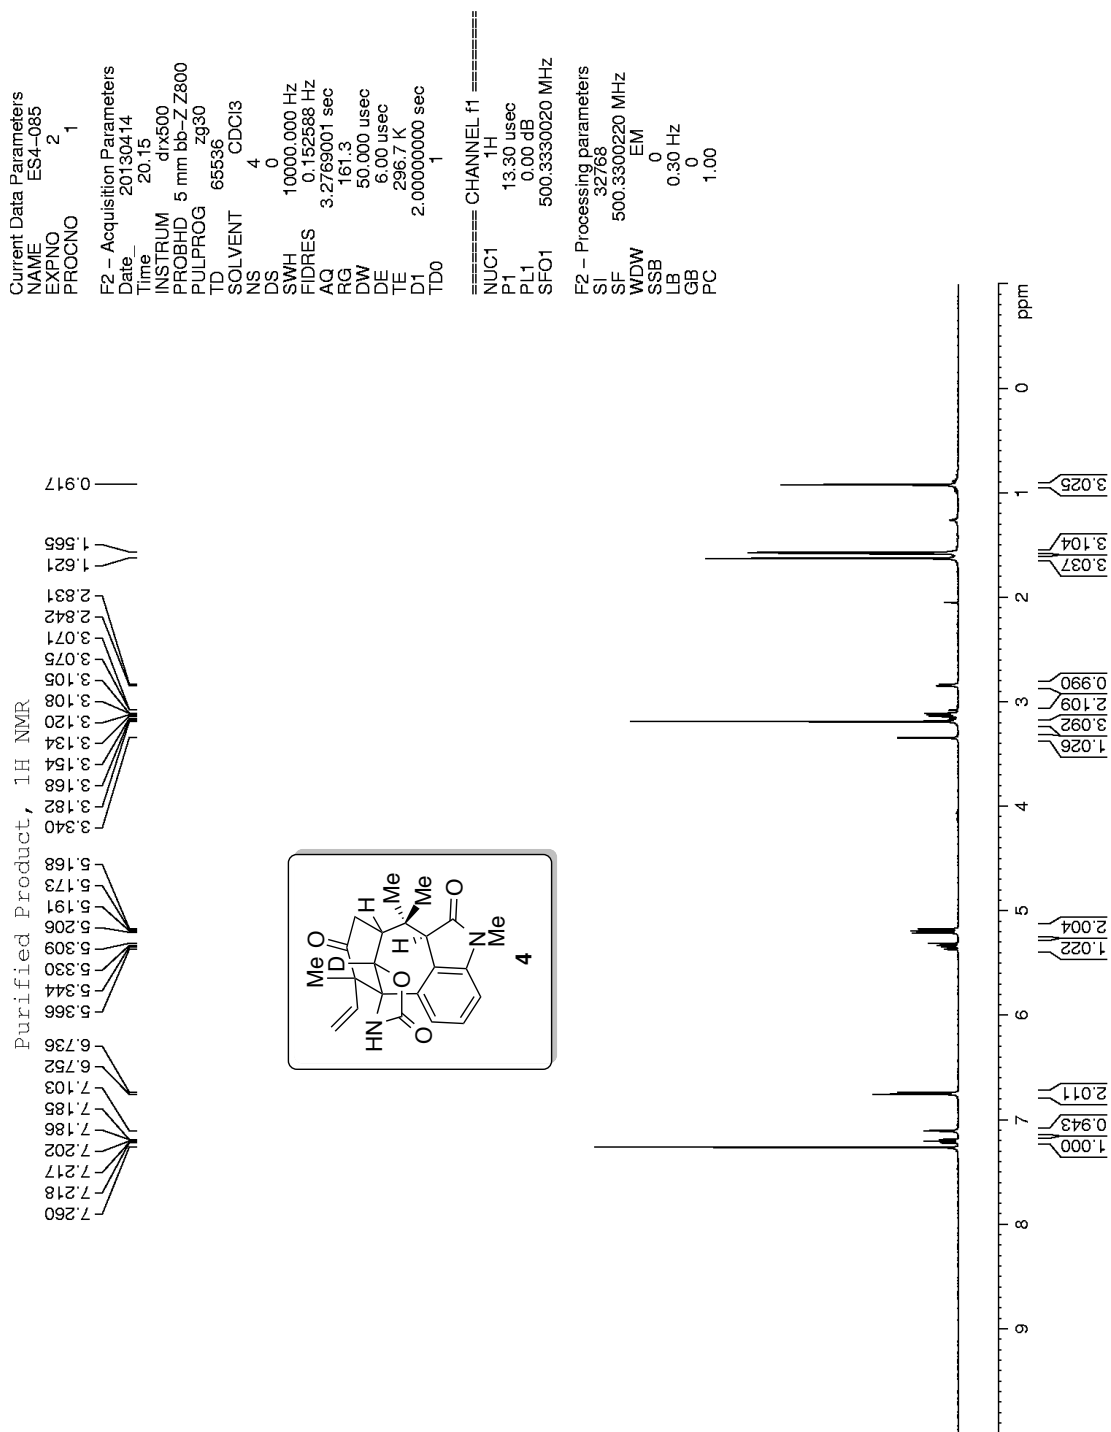

Current Data Parameters  
 NAME ES4-118  
 EXPNO 10  
 PROCNO 1

F2 - Acquisition Parameters  
 Date\_ 20130513  
 Time\_ 16.02  
 INSTRUM av500  
 PROBHD 5 mm DCH 13C-1  
 PULPROG zgpg2h.2  
 TD 13820  
 SOLVENT CDCl3  
 NS 37  
 DS 0  
 SWH 1535.627 Hz  
 FIDRES 0.111116 Hz  
 AQ 4.4998422 sec  
 RG 2.75  
 DW 325.600 usec  
 DE 18.00 usec  
 TE 300.0 K  
 D1 2.00000000 sec  
 D11 0.03000000 sec  
 TD0 1

==== CHANNEL f1 =====  
 SFO1 76.7734606 MHz  
 NUC1 2H  
 P1 225.00 usec

F2 - Processing parameters  
 SI 65536  
 SF 76.7729978 MHz  
 WDW EM  
 SSB 0  
 LB 0.30 Hz  
 GB 0  
 PC 1.00

Purified Product, 2H NMR

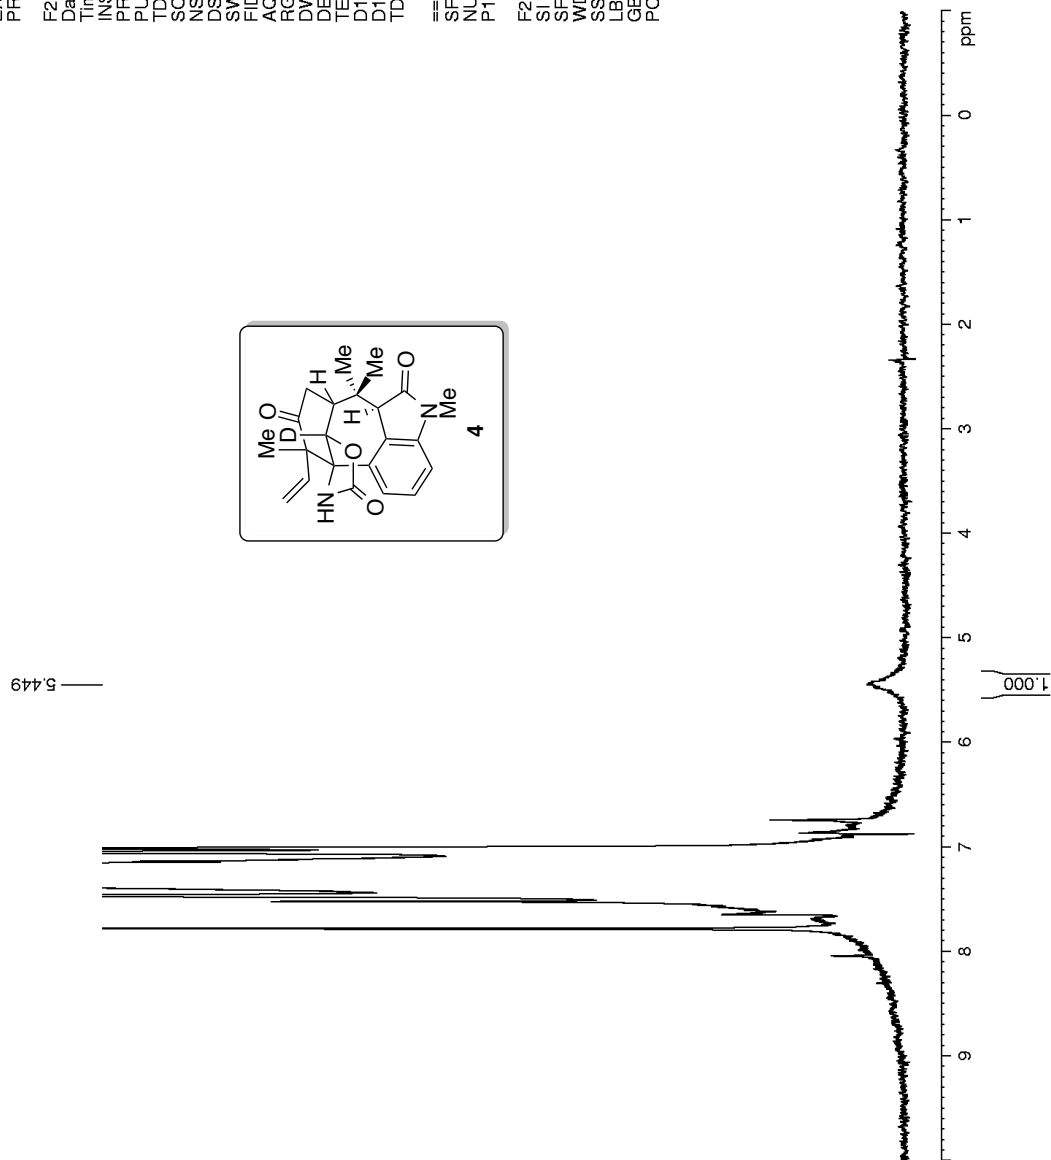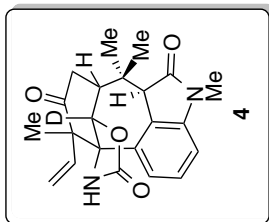

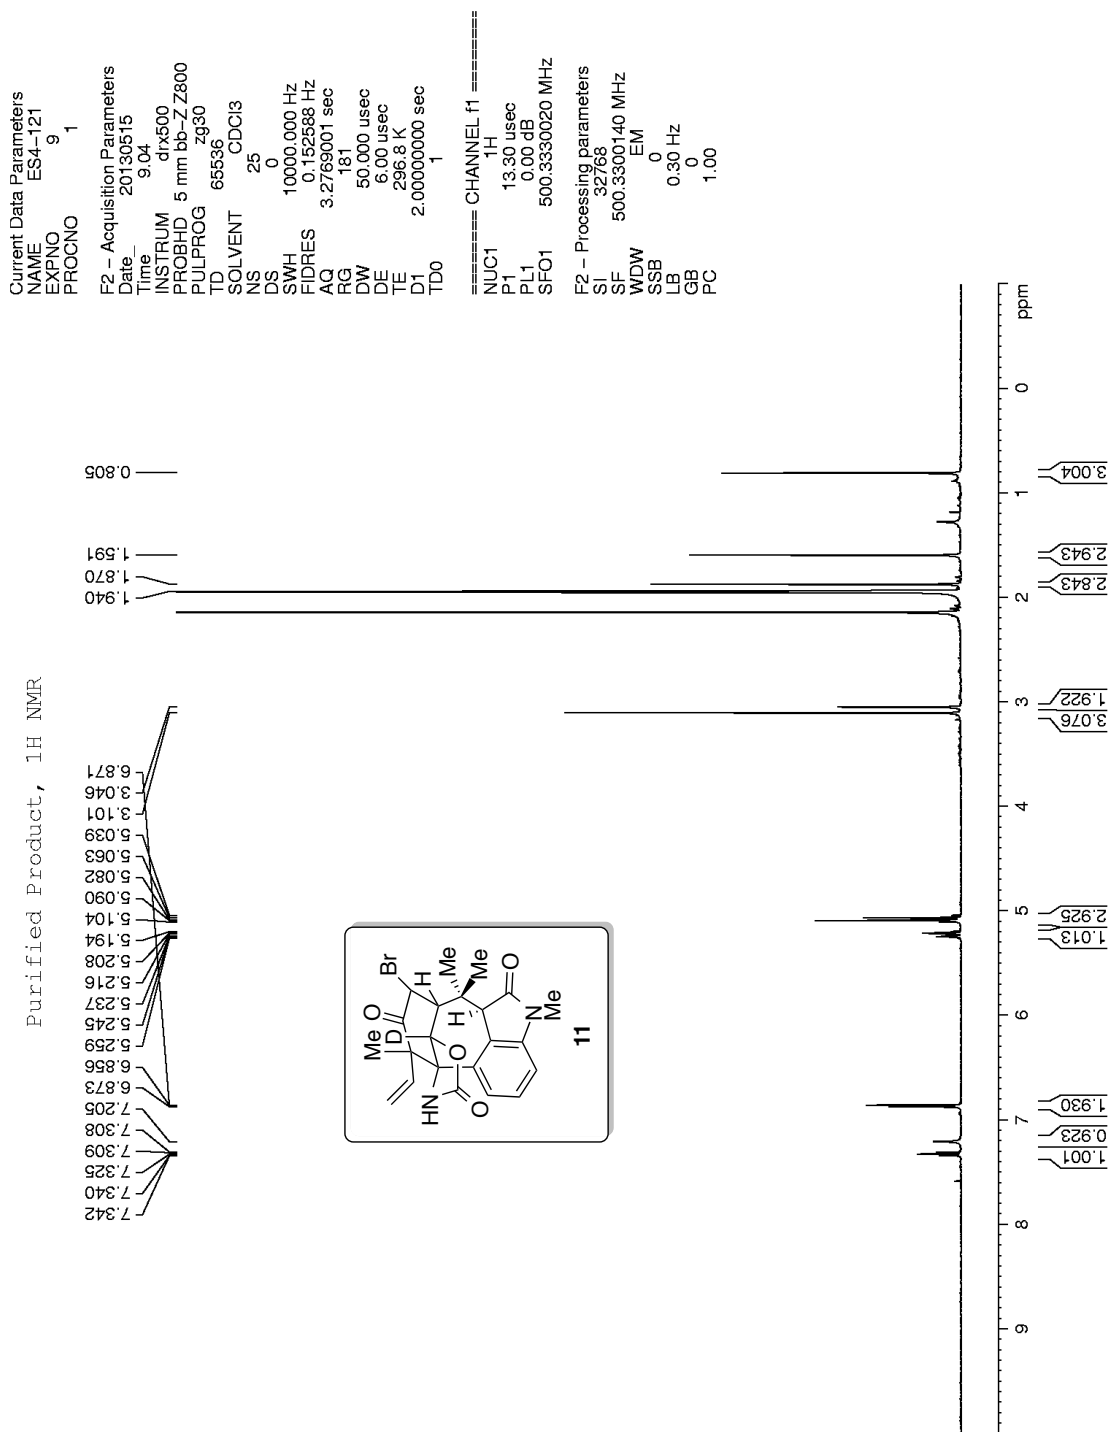

Purified Product, 2H NMR

Current Data Parameters  
 NAME ES4-120  
 EXPNO 2  
 PROCNO 1

F2 - Acquisition Parameters  
 Date 20130513  
 Time 9.53  
 INSTRUM av500  
 PROBHID 5 mm DCH 13C-1  
 PULPROG zg2h.2  
 TD 13820  
 SOLVENT CDCl3  
 NS 14  
 DS 0  
 SWH 1535.627 Hz  
 FIDRES 0.111116 Hz  
 AQ 4.4998422 sec  
 RG 2.75  
 DW 325.600 usec  
 DE 18.00 usec  
 TE 300.0 K  
 D1 2.0000000 sec  
 D11 0.0300000 sec  
 TDO 1

===== CHANNEL f1 =====  
 SFO1 76.7734606 MHz  
 NUC1 2H  
 P1 225.00 usec

F2 - Processing parameters  
 SI 65536  
 SF 76.7729985 MHz  
 WDW EM  
 SSB 0  
 LB 0  
 GB 0  
 PC 1.00

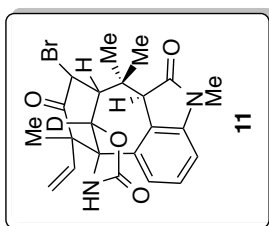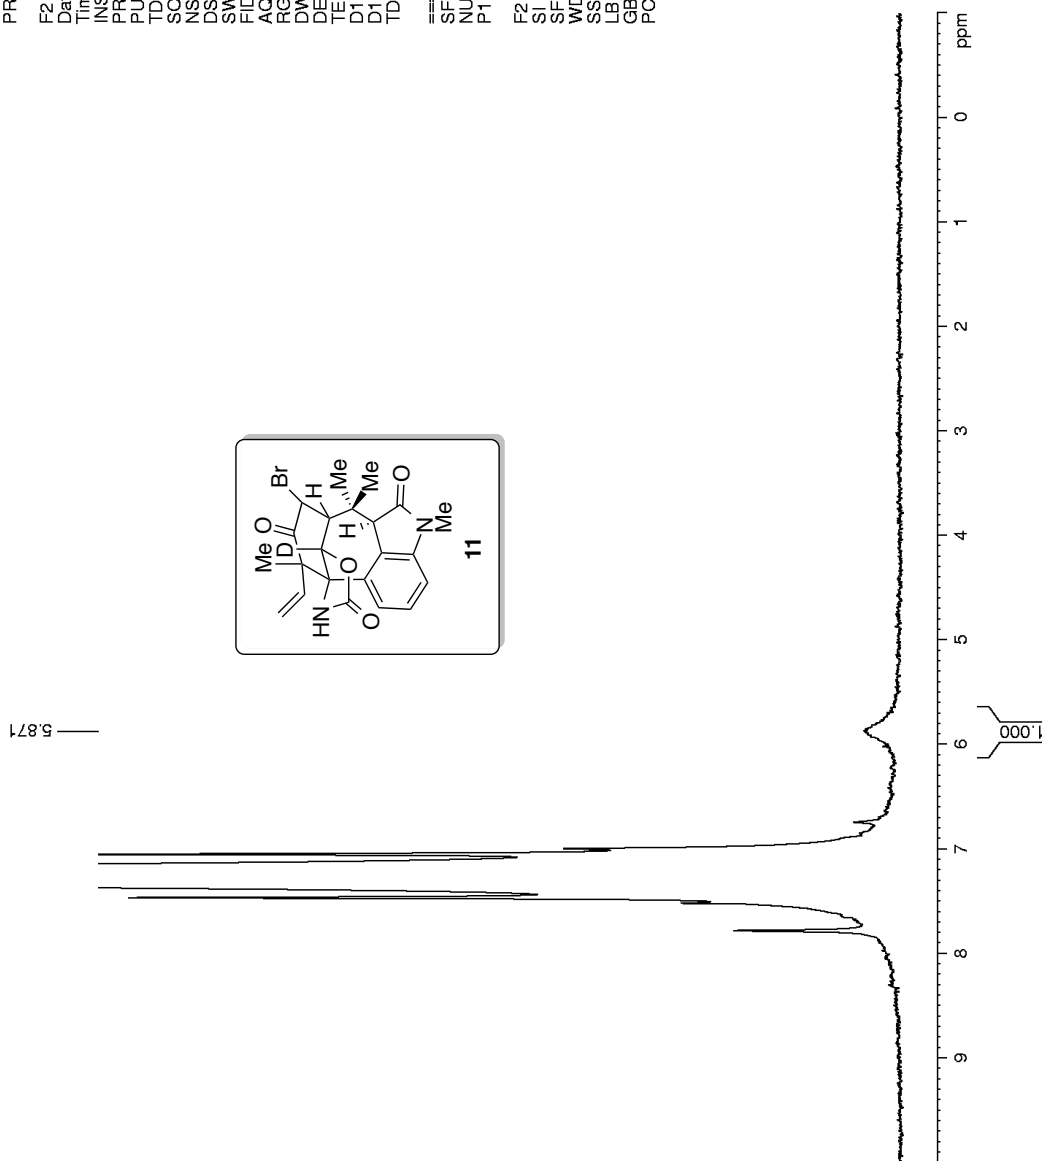

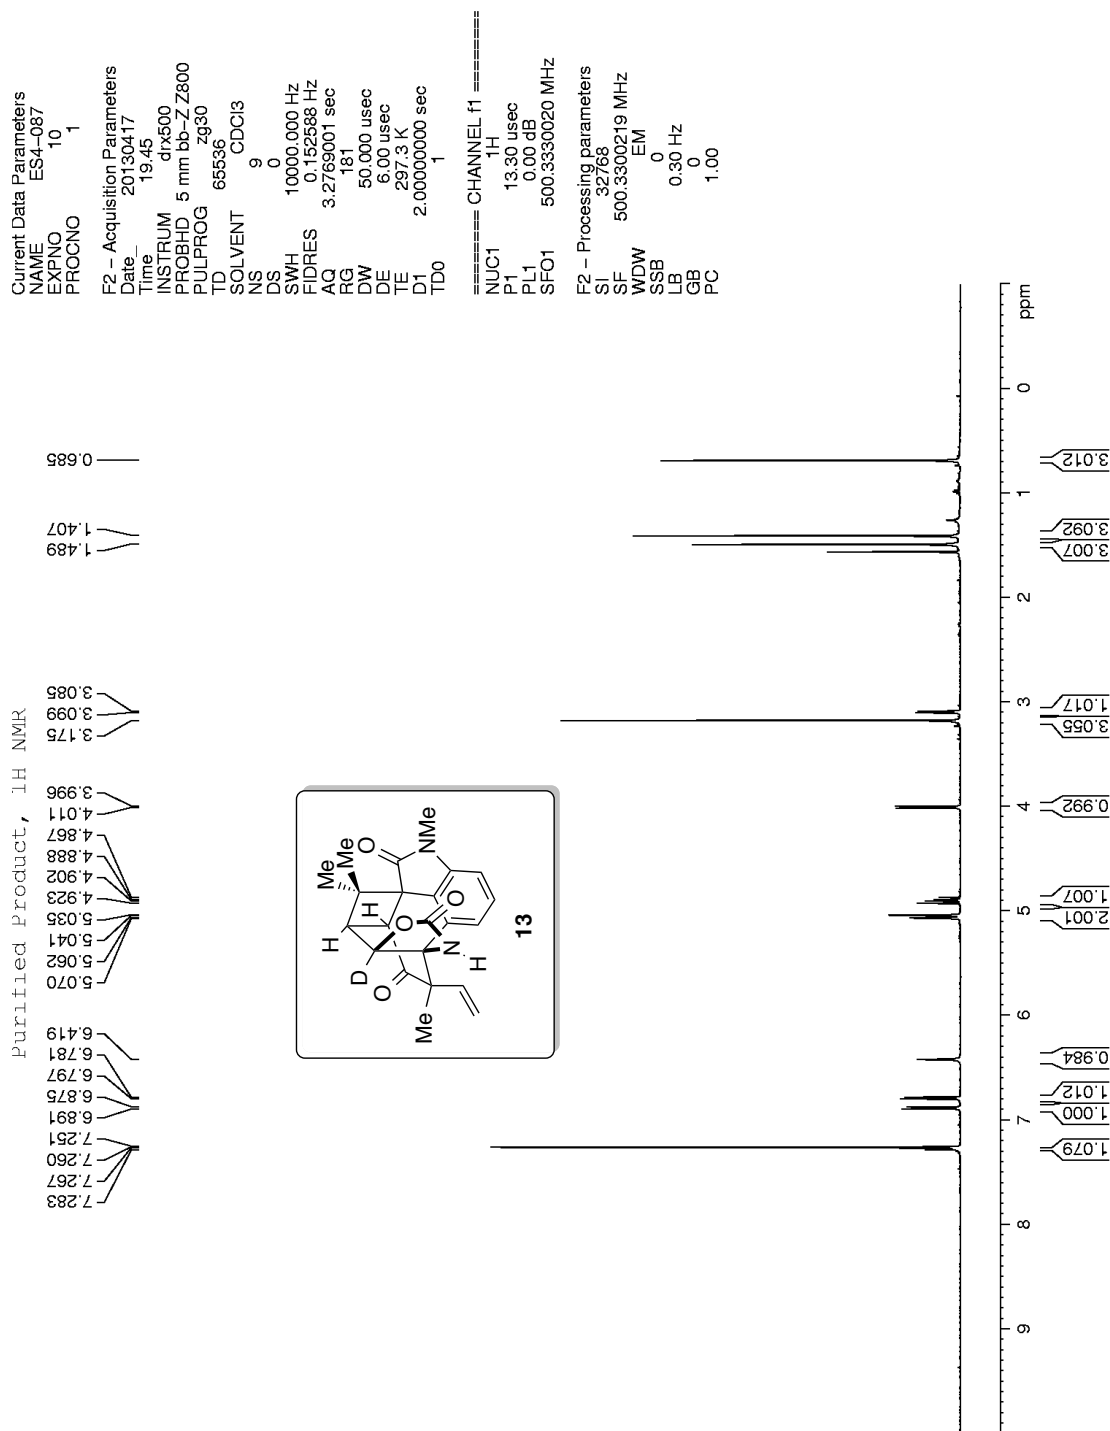



Purified Product, 2H NMR

Current Data Parameters  
 NAME ES4-087  
 EXPNO 12  
 PROCNO 1

F2 - Acquisition Parameters  
 Date\_ 20130610  
 Time\_ 18.21  
 INSTRUM av500  
 PROBHD 5 mm DCH 13C-1  
 PULPROG zgpg30  
 TD 13820  
 SOLVENT CDCl3  
 NS 16  
 DS 0  
 SWH 1535.627 Hz  
 FIDRES 0.111116 Hz  
 AQ 4.4998422 sec  
 RG 2.75  
 DW 325.600 usec  
 DE 18.00 usec  
 TE 300.0 K  
 D1 2.00000000 sec  
 D11 0.03000000 sec  
 TD0 1

==== CHANNEL f1 =====  
 SFO1 76.7734606 MHz  
 NUC1 2H  
 P1 225.00 usec

F2 - Processing parameters  
 SI 65536  
 SF 76.7729983 MHz  
 WDW EM  
 SSB 0  
 LB 0.30 Hz  
 GB 0  
 PC 1.00

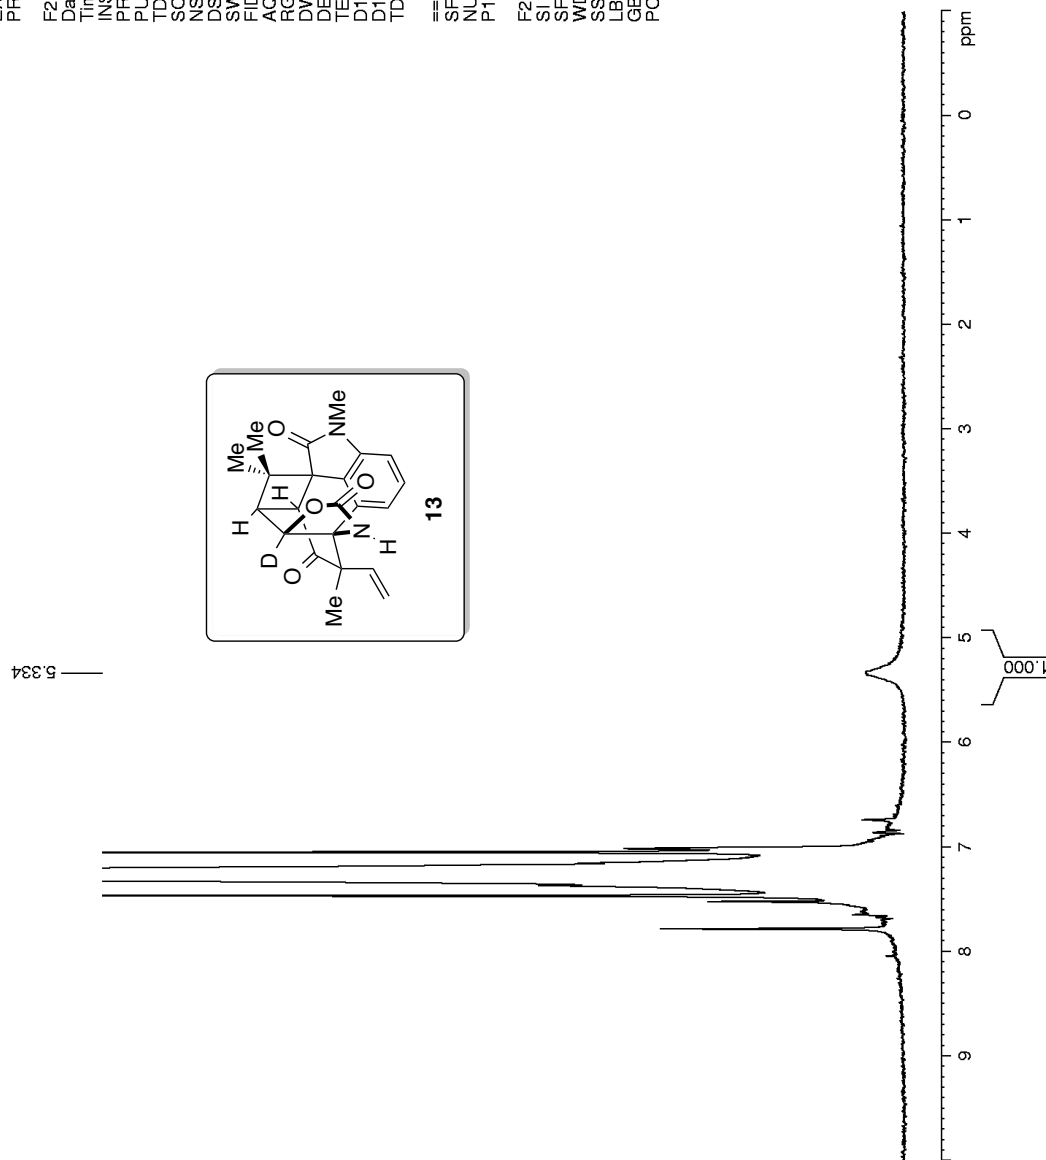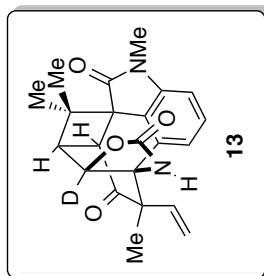

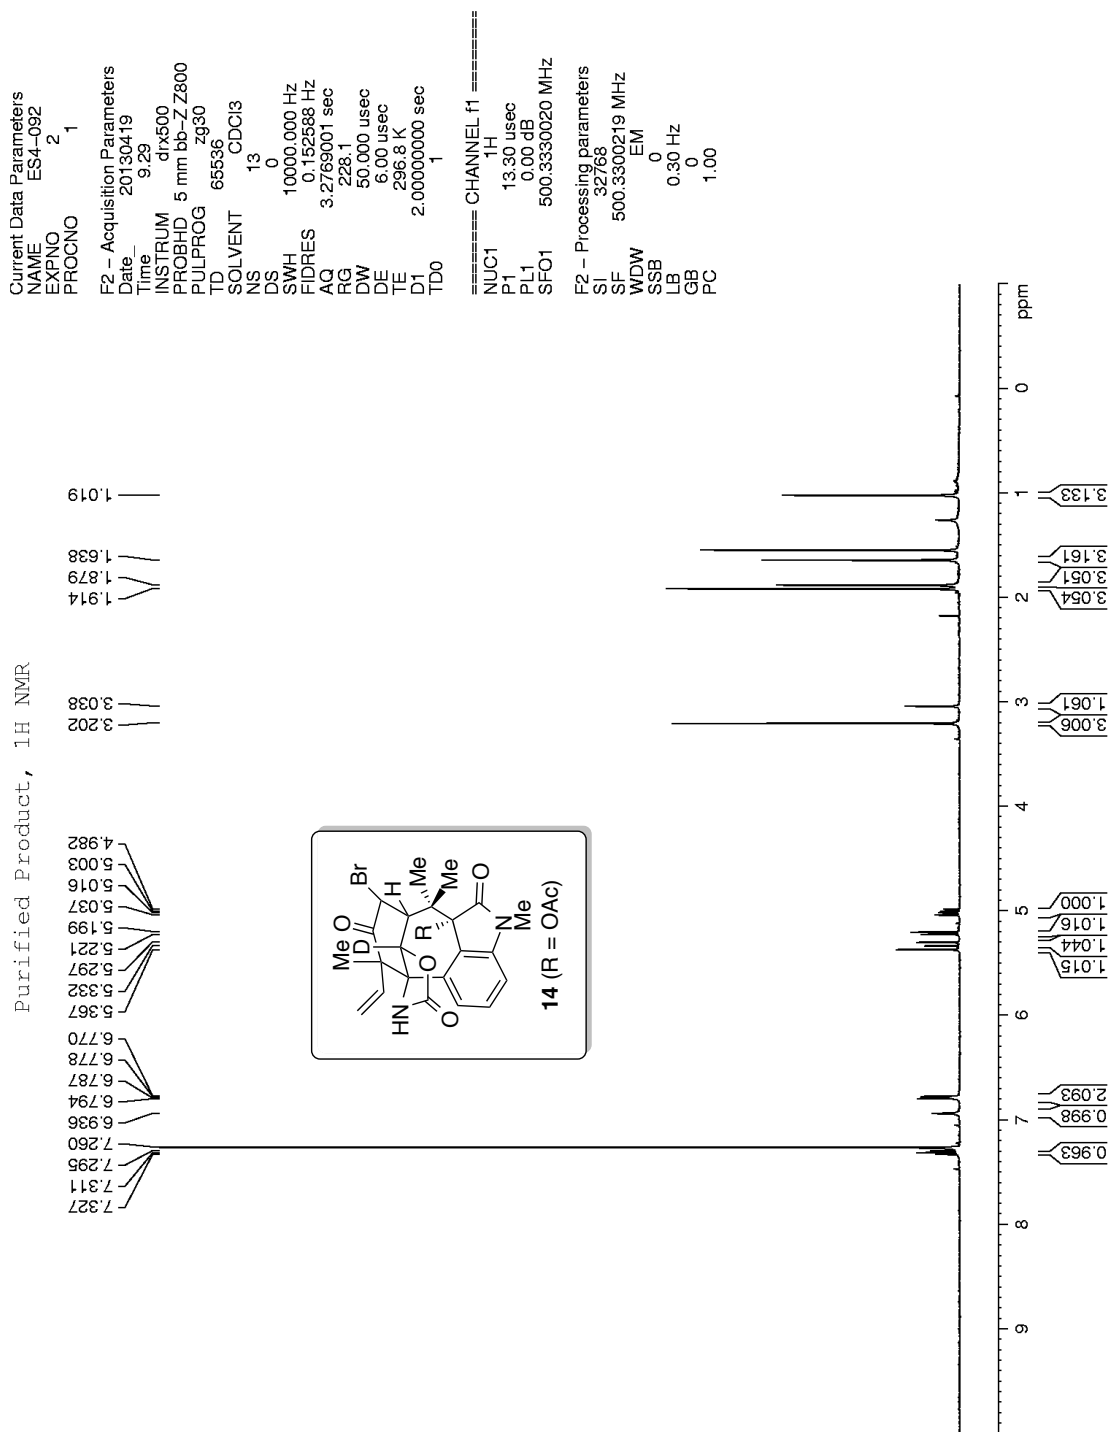

Purified Product, 2H NMR

5.867

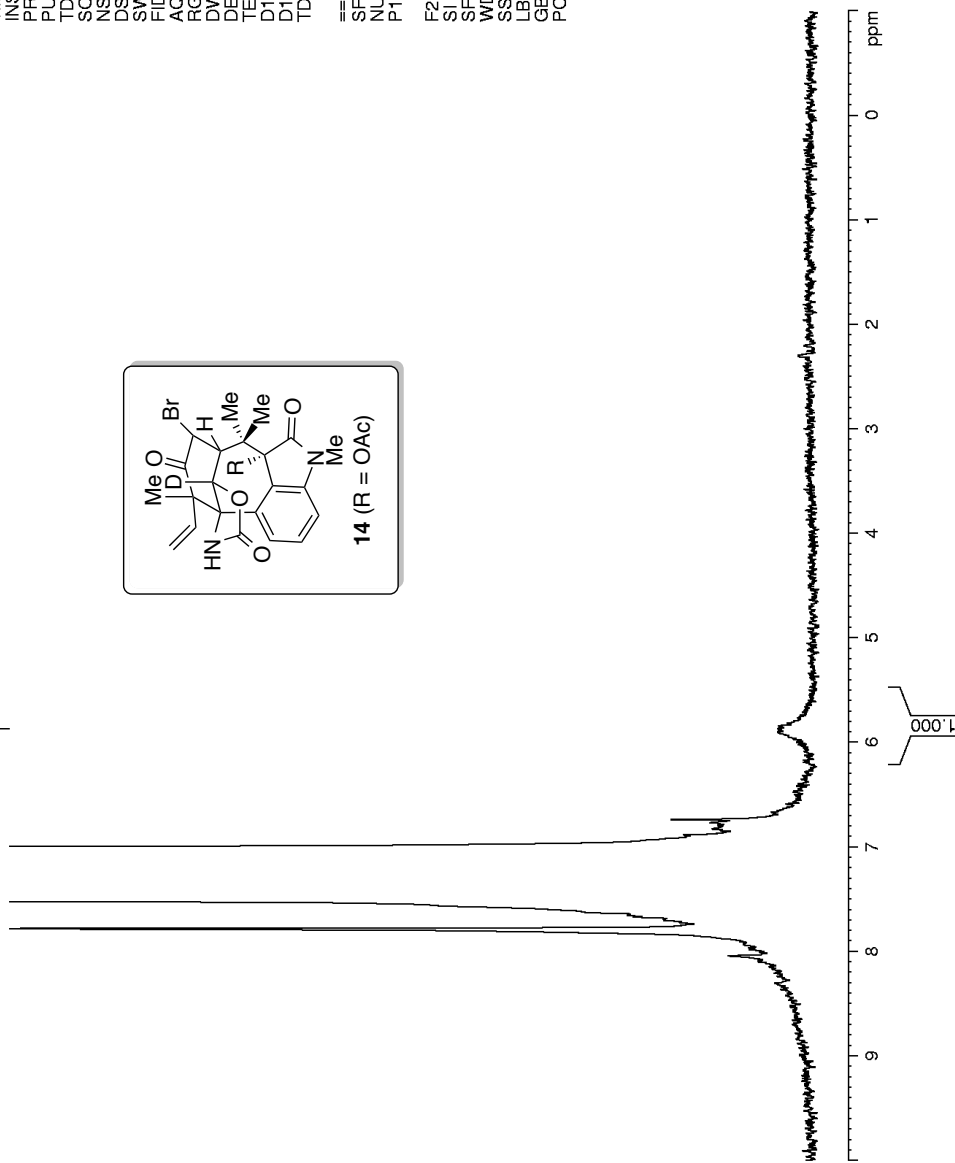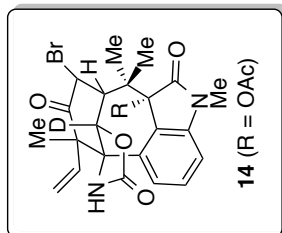

Current Data Parameters  
 NAME ES4-134  
 EXPNO 10  
 PROCNO 1

F2 - Acquisition Parameters  
 Date\_ 20130610  
 Time 18:28  
 INSTRUM av500  
 PROBHD 5 mm DCH 13C-1  
 PULPROG zg2h.2  
 TD 13820  
 SOLVENT CDCl3  
 NS 62  
 DS 0  
 SWH 1535.627 Hz  
 FIDRES 0.111116 Hz  
 AQ 4.4998422 sec  
 RG 2.75  
 DW 325.600 usec  
 DE 18.00 usec  
 TE 300.0 K  
 D1 2.00000000 sec  
 D11 0.03000000 sec  
 TD0 1

===== CHANNEL f1 =====  
 SFO1 76.7734506 MHz  
 NUC1 2H  
 P1 225.00 usec

F2 - Processing parameters  
 SI 65536  
 SF 76.7729986 MHz  
 WDW EM  
 SSB 0  
 LB 0.30 Hz  
 GB 0  
 PC 1.00

Purified Product, <sup>1</sup>H NMR

Current Data Parameters  
 NAME NAW-1-135p  
 EXPNO 1  
 PROCNO 1

F2 - Acquisition Parameters  
 Date\_ 20130513  
 Time 16:38  
 INSTRUM av500  
 PROBHHD 5 mm DCH 13C-1  
 PULPROG zg30  
 TD 65536  
 SOLVENT CDCl3  
 NS 8  
 DS 0  
 SWH 10000.000 Hz  
 FIDRES 0.152588 Hz  
 AQ 3.2768500 sec  
 RG 11  
 DW 50.000 usec  
 DE 10.00 usec  
 TE 298.0 K  
 D1 2.00000000 sec  
 TD0 1

===== CHANNEL f1 =====  
 NUC1 1H  
 P1 10.00 usec

F2 - Processing parameters  
 SI 65536  
 SF 500.1300138 MHz  
 WDW EM  
 SSB 0  
 LB 0.30 Hz  
 GB 0  
 PC 1.00

1.026  
 1.416  
 1.446

3.230  
 3.288  
 3.303

4.755  
 4.786  
 4.903  
 4.931  
 4.937  
 4.946  
 5.192  
 5.213  
 5.226  
 5.248

6.799  
 6.814  
 6.924  
 6.939  
 7.239  
 7.254  
 7.260  
 7.270  
 7.667

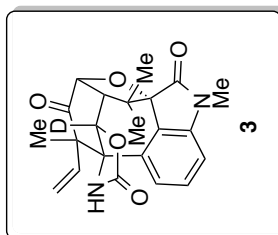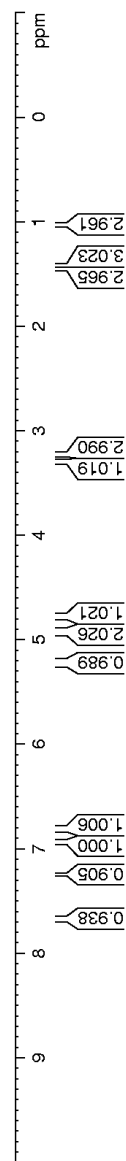

Purified Product, 2H NMR

Current Data Parameters  
 NAME NAW-1-135p  
 EXPNO 2  
 PROCNO 1

F2 - Acquisition Parameters  
 Date\_ 20130514  
 Time 9.23  
 INSTRUM av500  
 PROBHD 5 mm DCH 13C-1  
 PULPROG zg2h.2  
 TD 13820  
 SOLVENT CDCl3

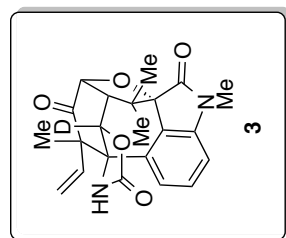

NS 27  
 DS 0  
 SWH 1535.627 Hz  
 FIDRES 0.111116 Hz  
 AQ 4.4998422 sec  
 RG 2.75  
 DW 325.600 usec  
 DE 18.00 usec  
 TE 300.0 K  
 D1 2.00000000 sec  
 D11 0.03000000 sec  
 TDO 1

===== CHANNEL f1 =====  
 NUJC1 2H  
 P1 225.00 usec

F2 - Processing parameters  
 SI 65536  
 SF 76.7730012 MHz  
 WDW EM  
 SSB 0  
 LB 0.30 Hz  
 GB 0  
 PC 1.00

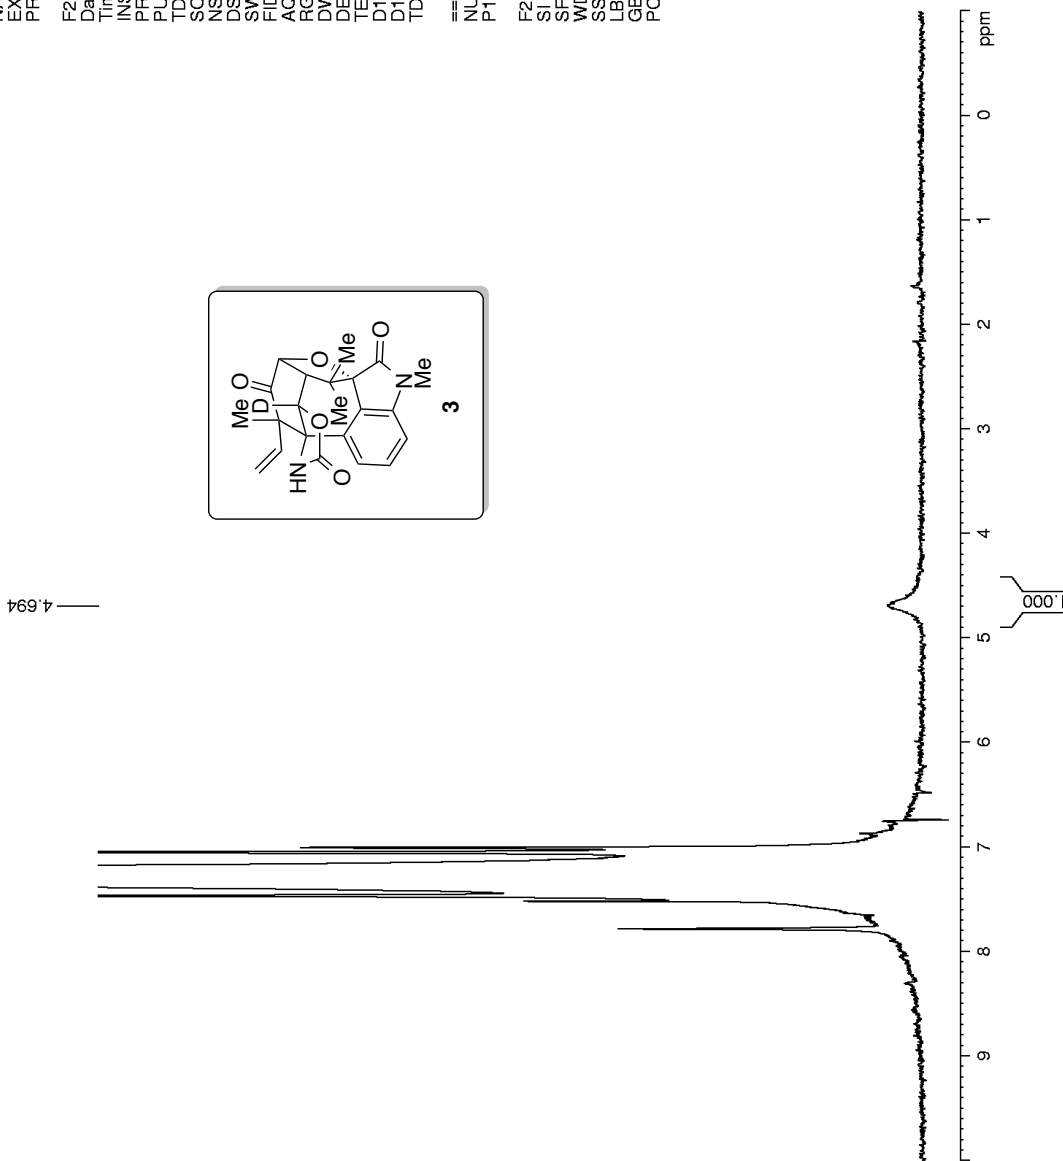

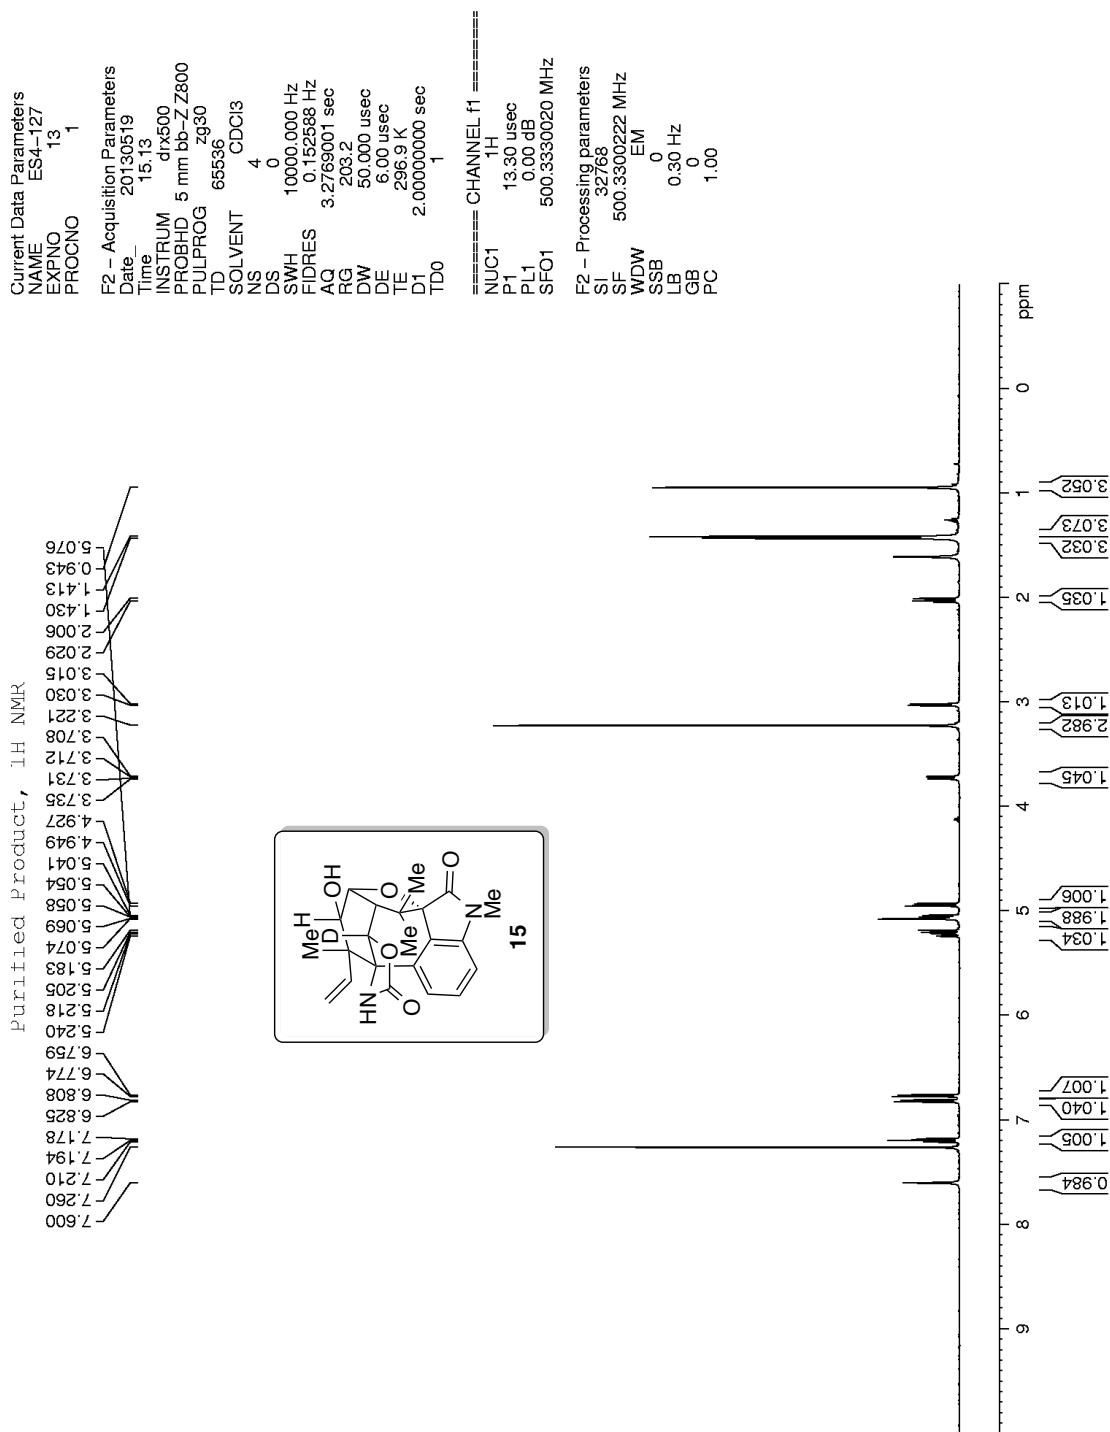

Purified Product, 2H NMR

```

Current Data Parameters
NAME      ES4-127
EXPNO    12
PROCNO    1

F2 - Acquisition Parameters
Date_     20130519
Time      15.08
INSTRUM   av500
PROBHD    5 mm DCH 13C-1
PULPROG   zg2h.2
TD         13820
SOLVENT   CDCl3
NS         20
DS         0
SWH        1535.627 Hz
FIDRES     0.111116 Hz
AQ         4.4998422 sec
RG         2.75
DW         325.600 usec
DE         18.00 usec
TE         300.0 K
D1         2.00000000 sec
D11        0.03000000 sec
TD0        1

===== CHANNEL f1 =====
SFO1      76.7734606 MHz
NUC1       2H
P1         225.00 usec

F2 - Processing parameters
SI         65536
SF         76.7729985 MHz
WDW        EM
SSB        0
LB         0.30 Hz
GB         0
PC         1.00
    
```

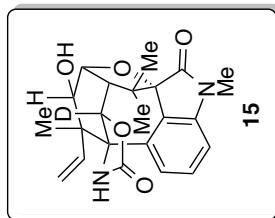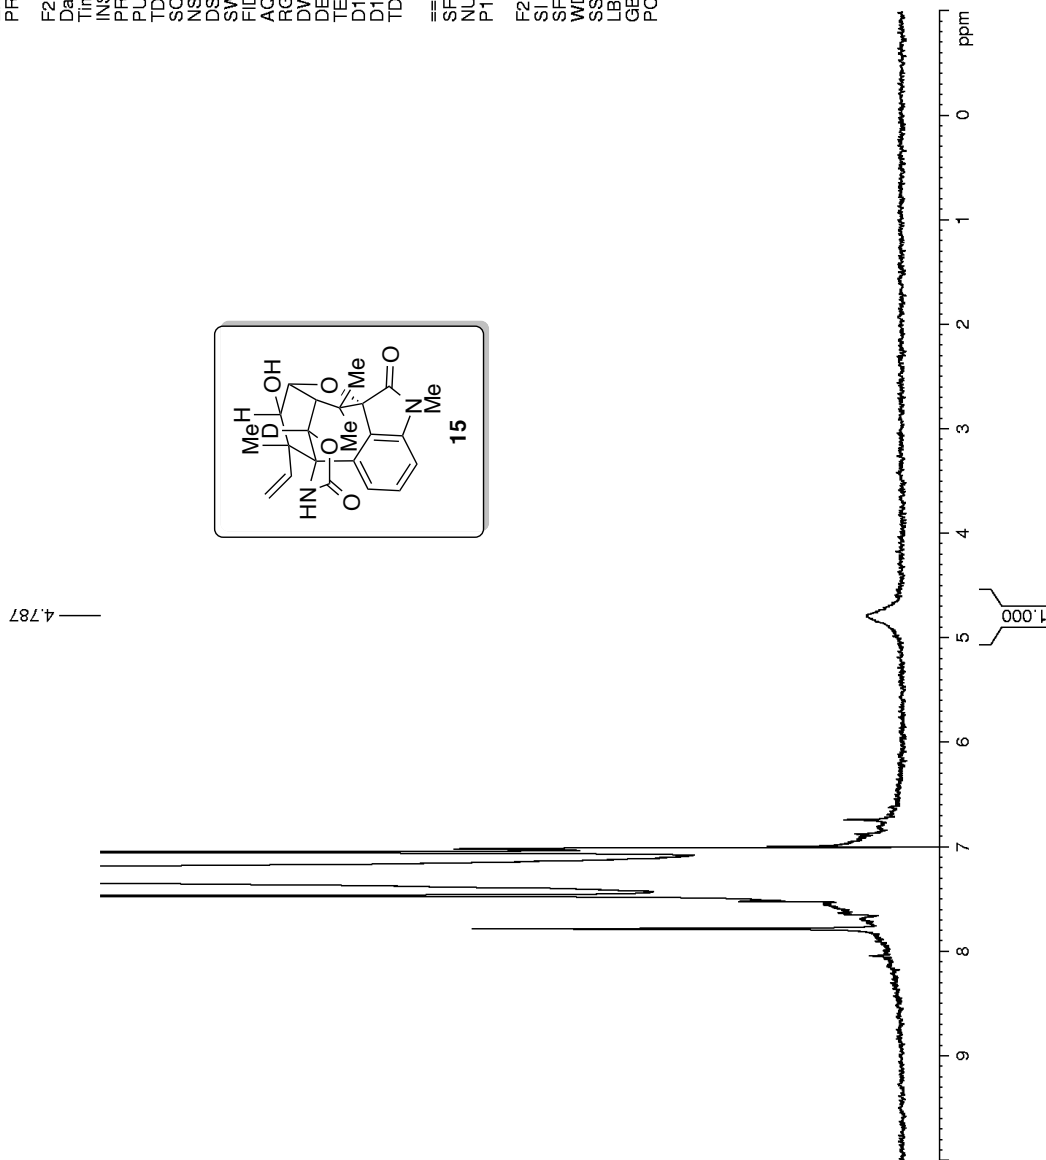

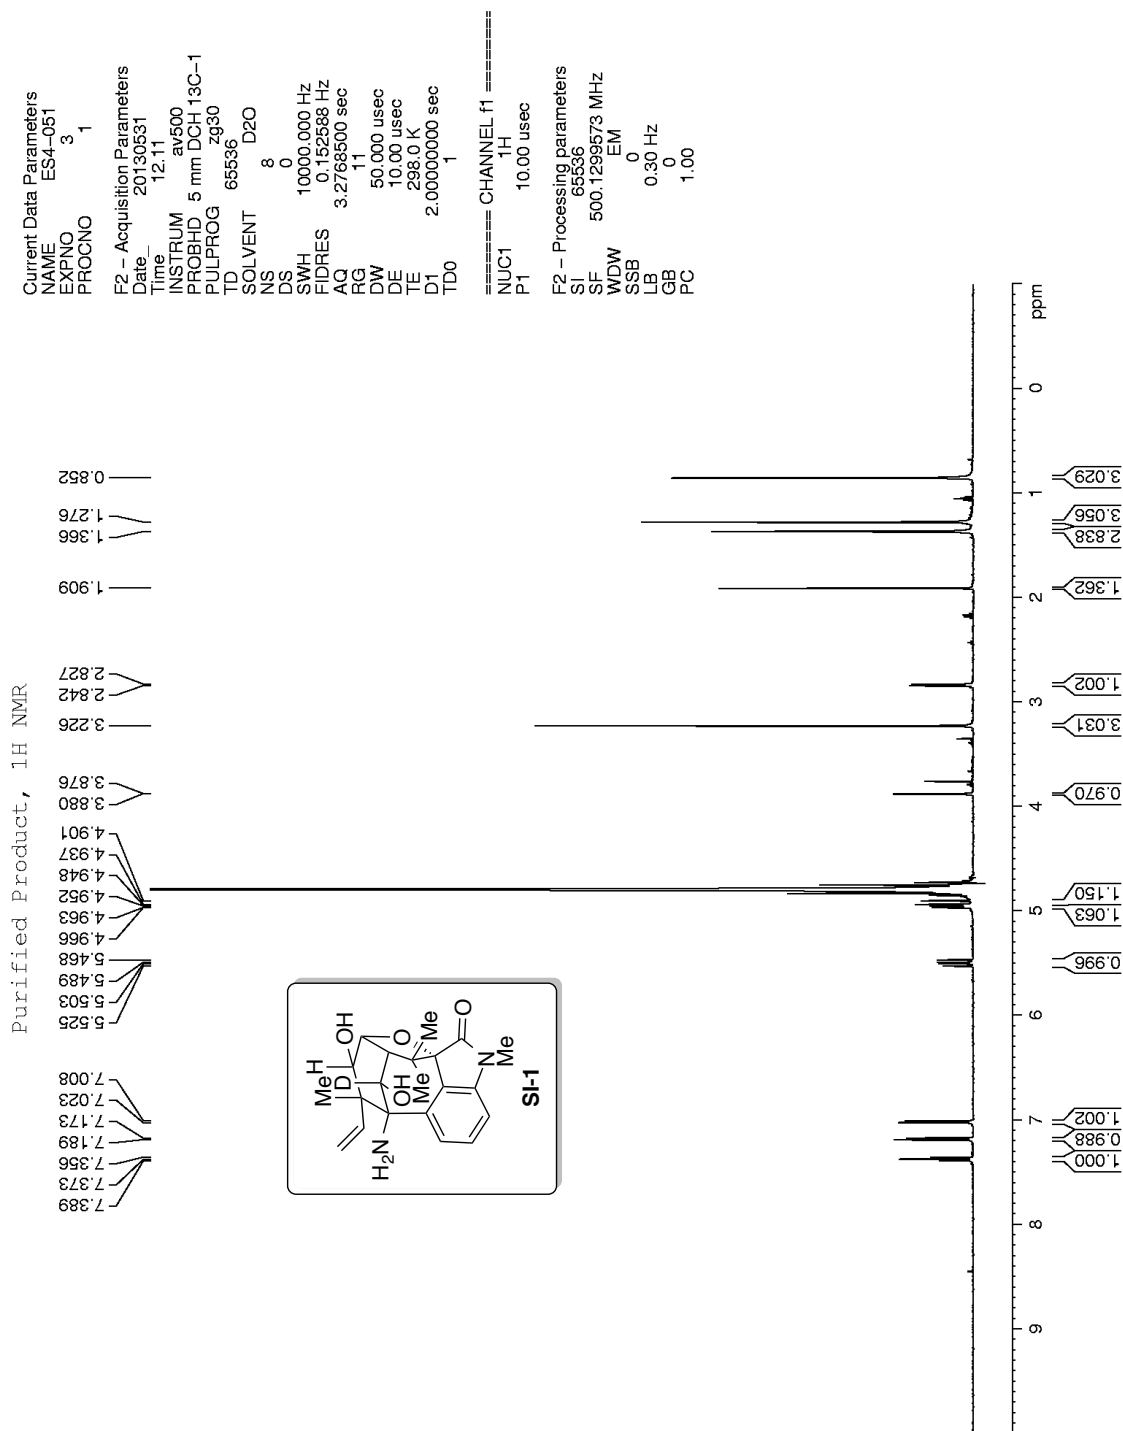



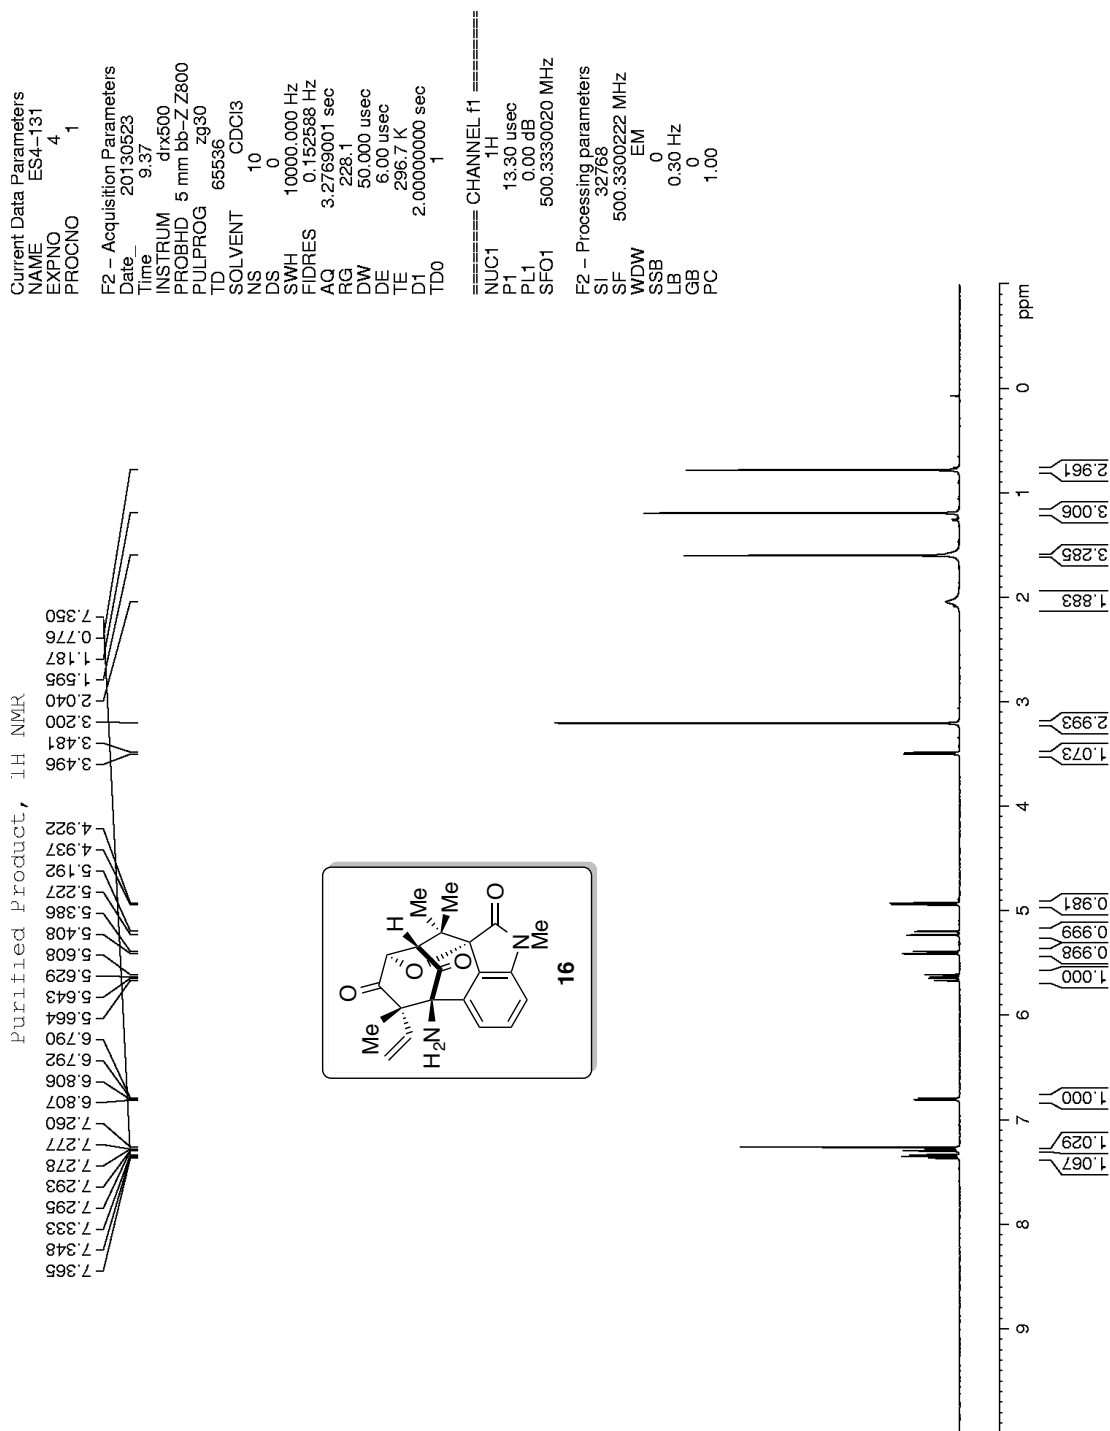

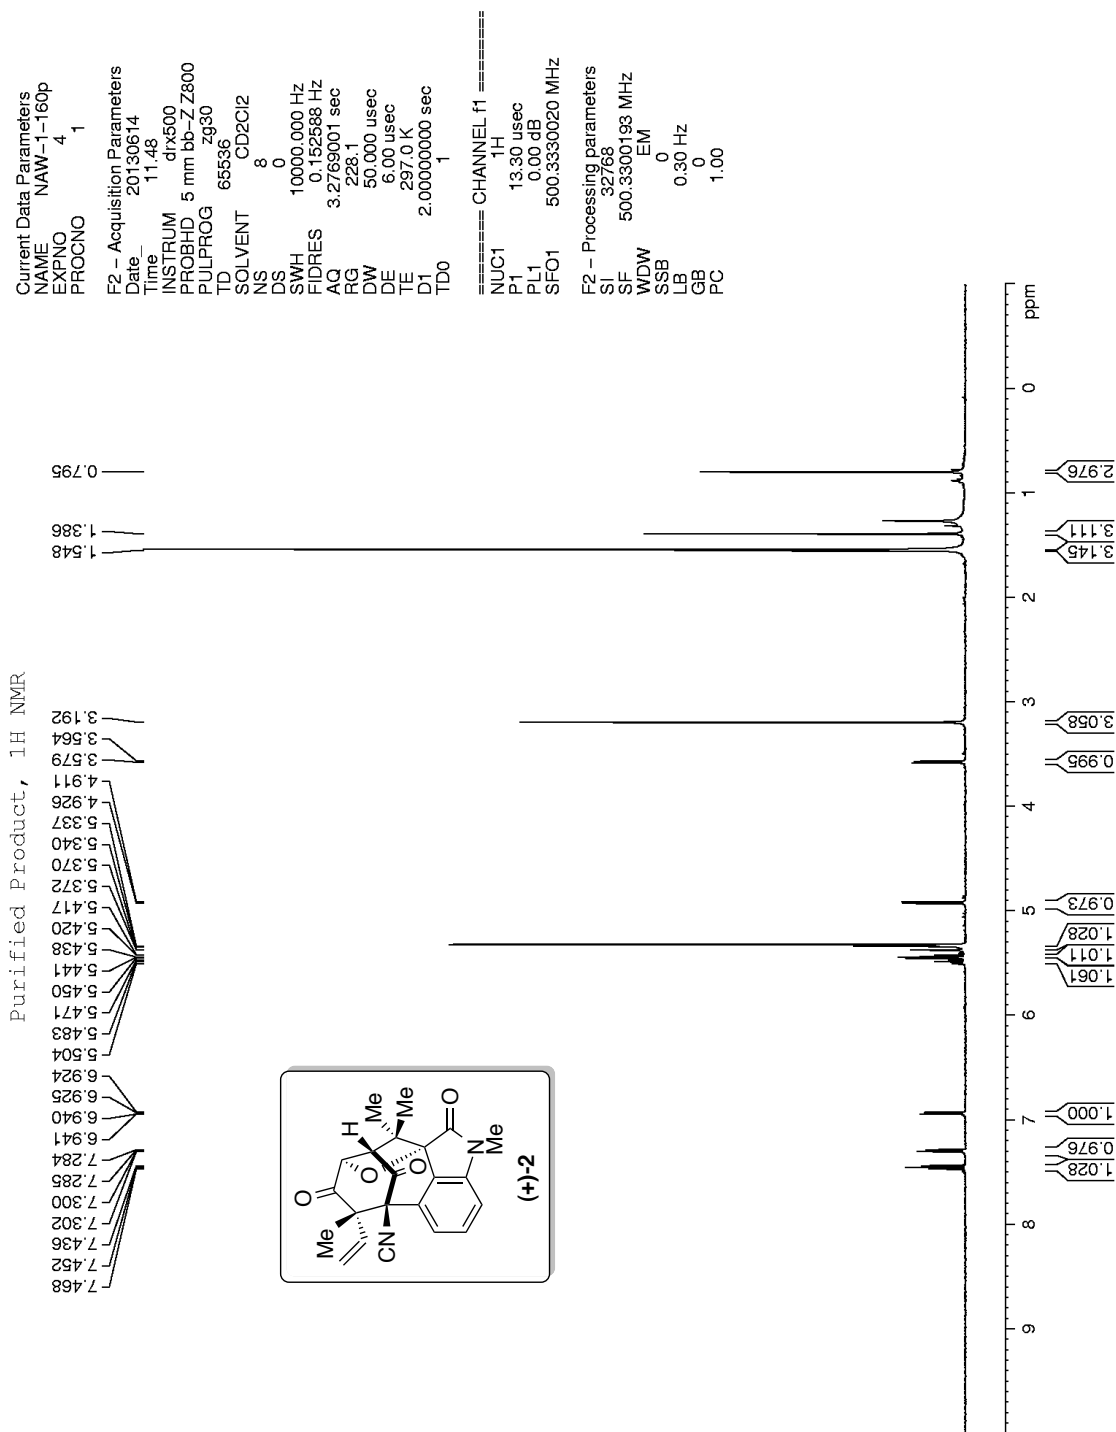

**<sup>13</sup>C NMR Spectra:**

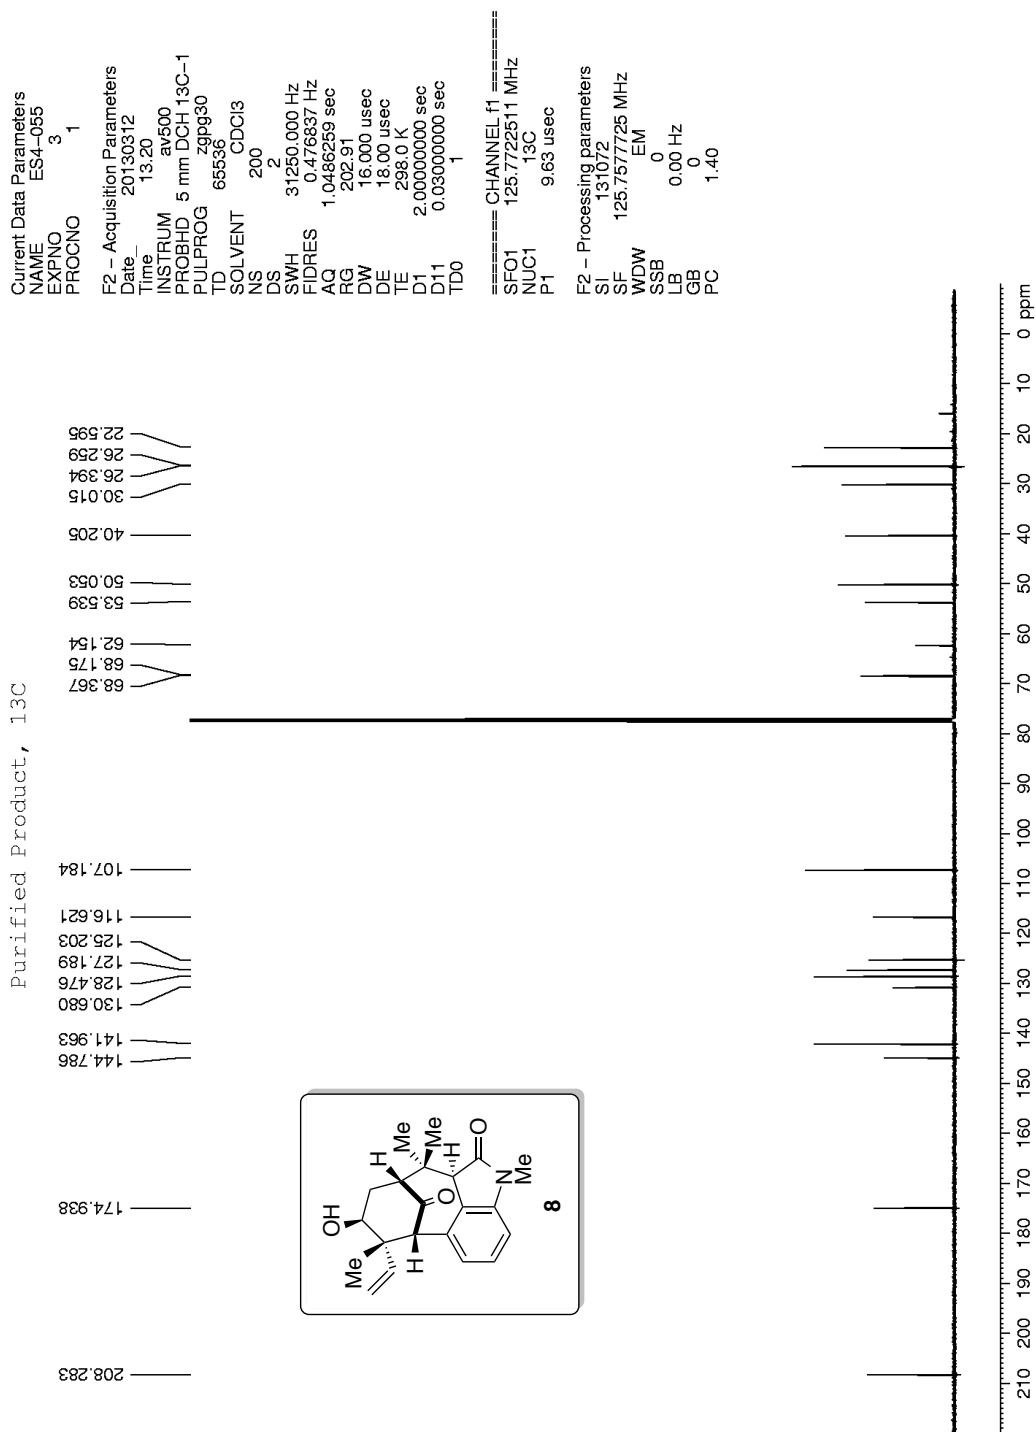

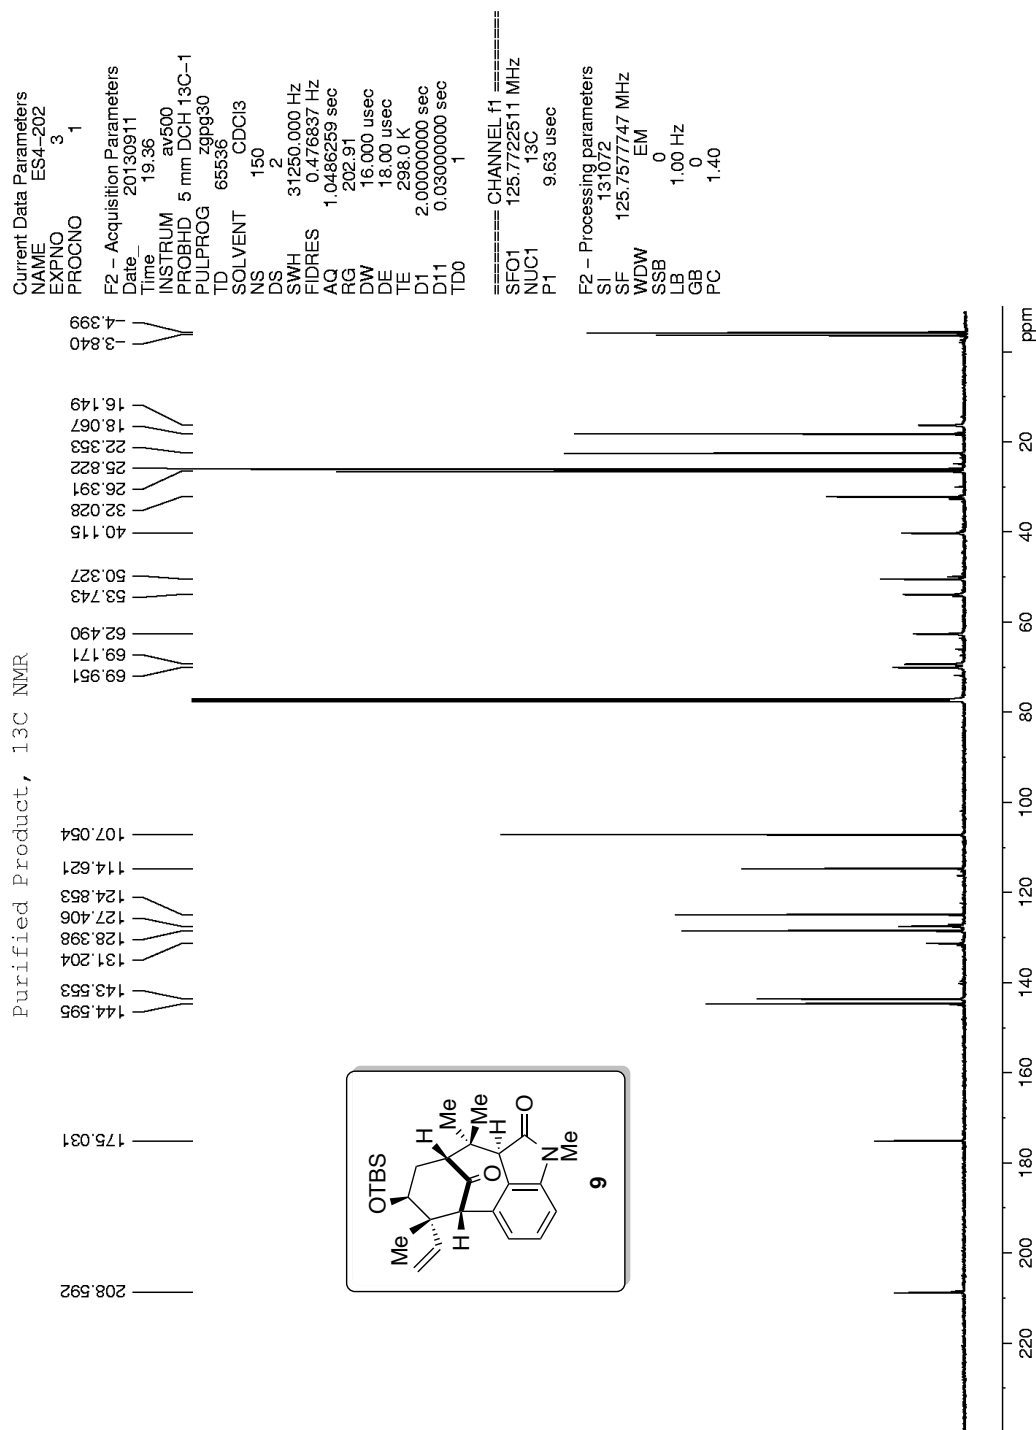

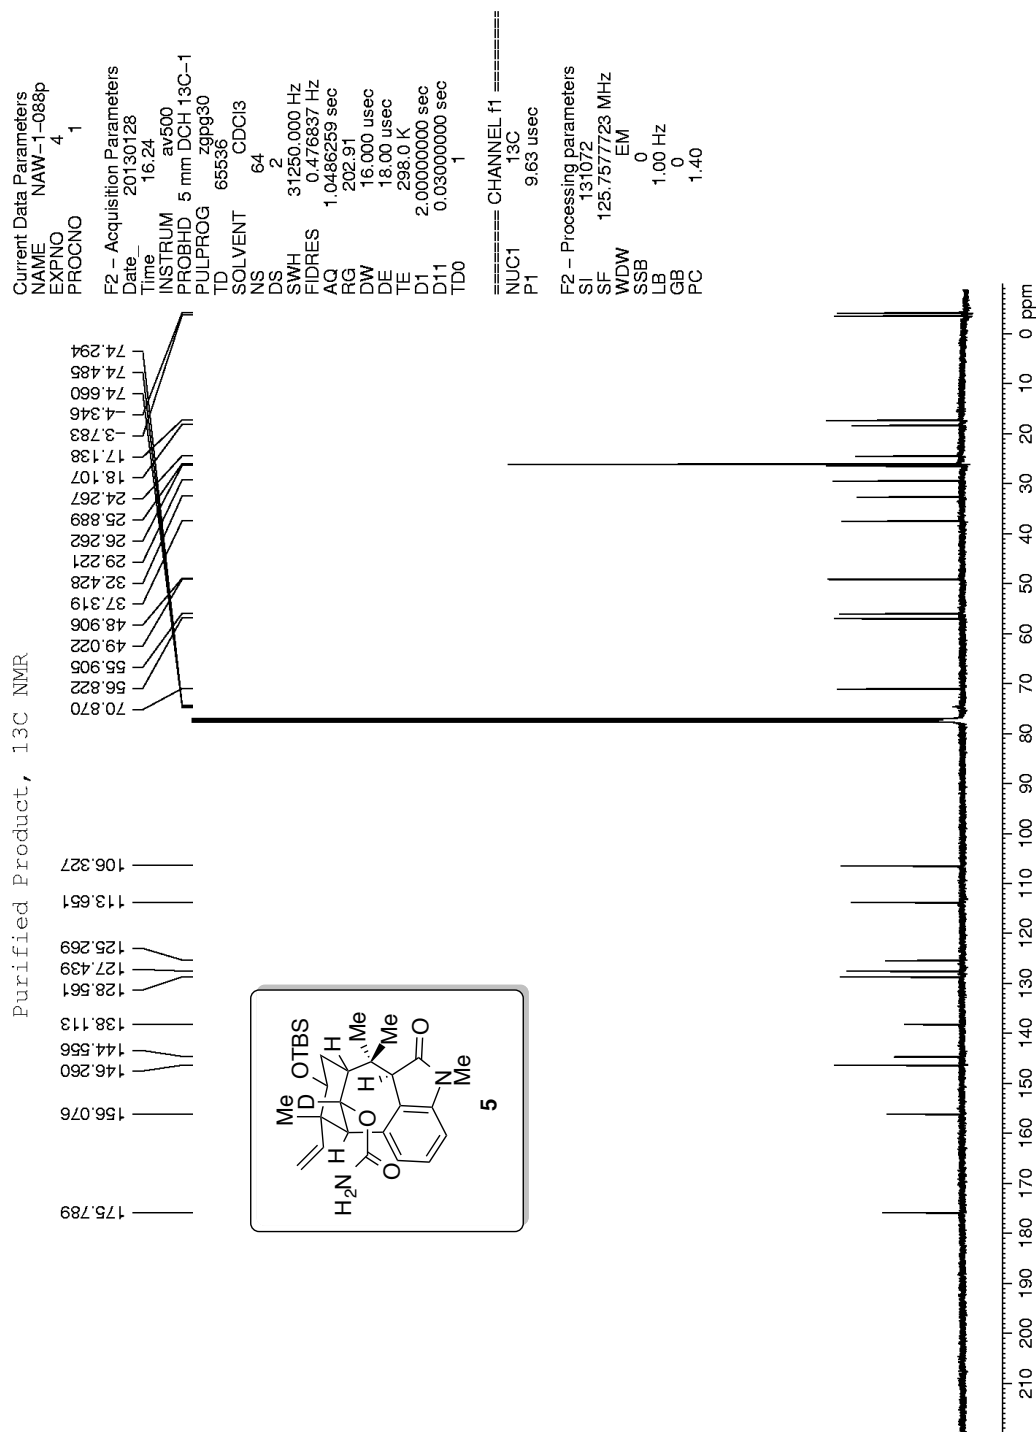

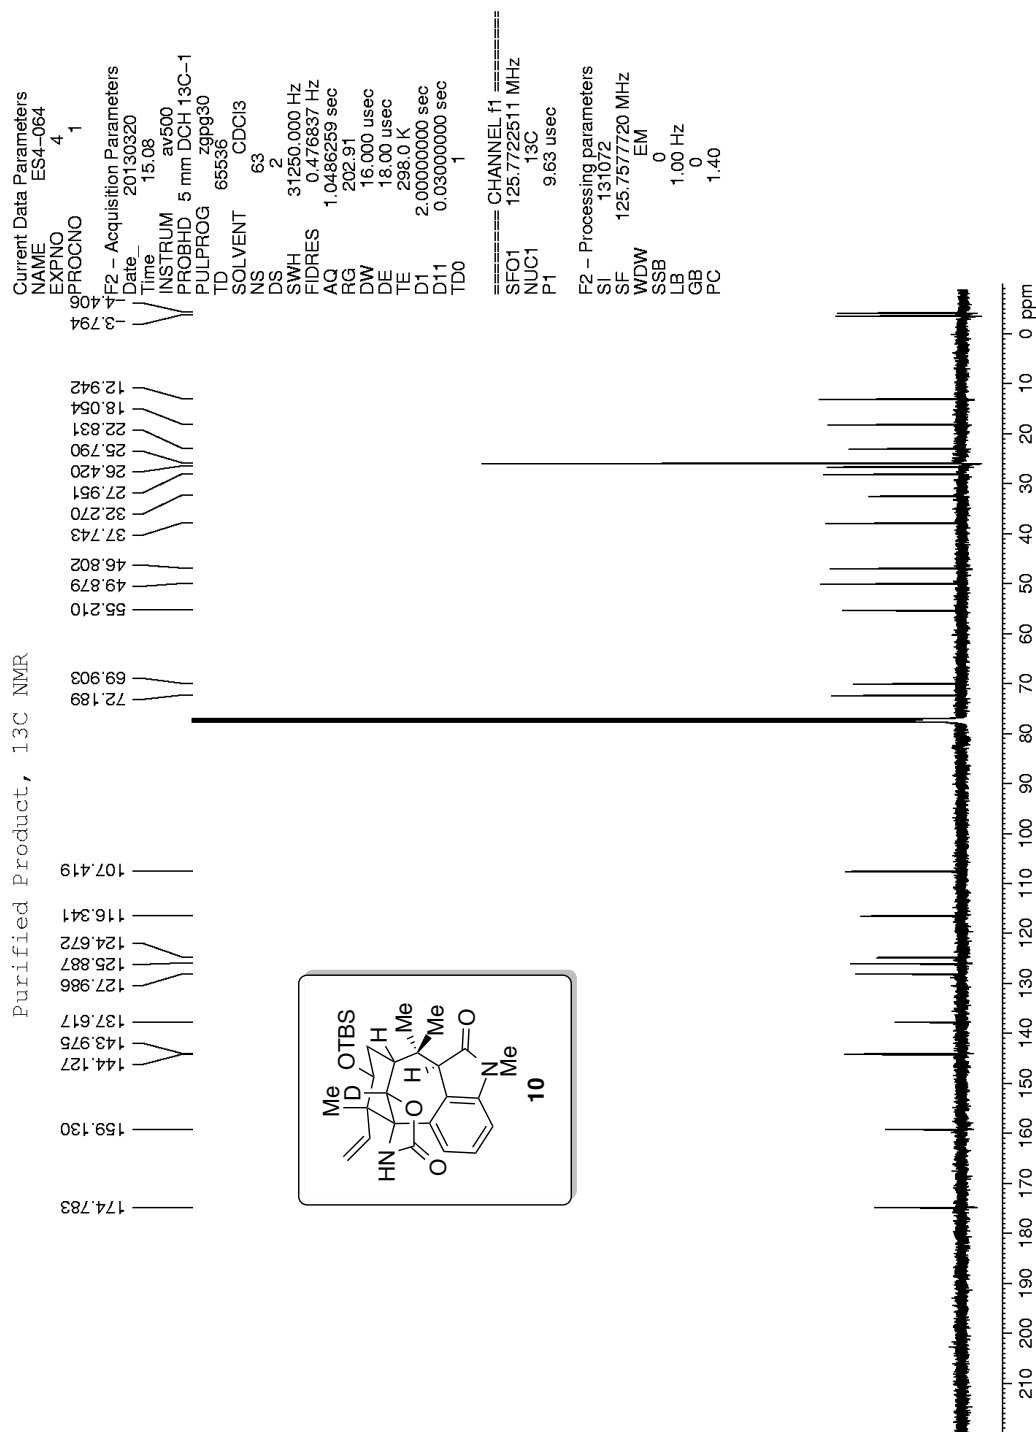

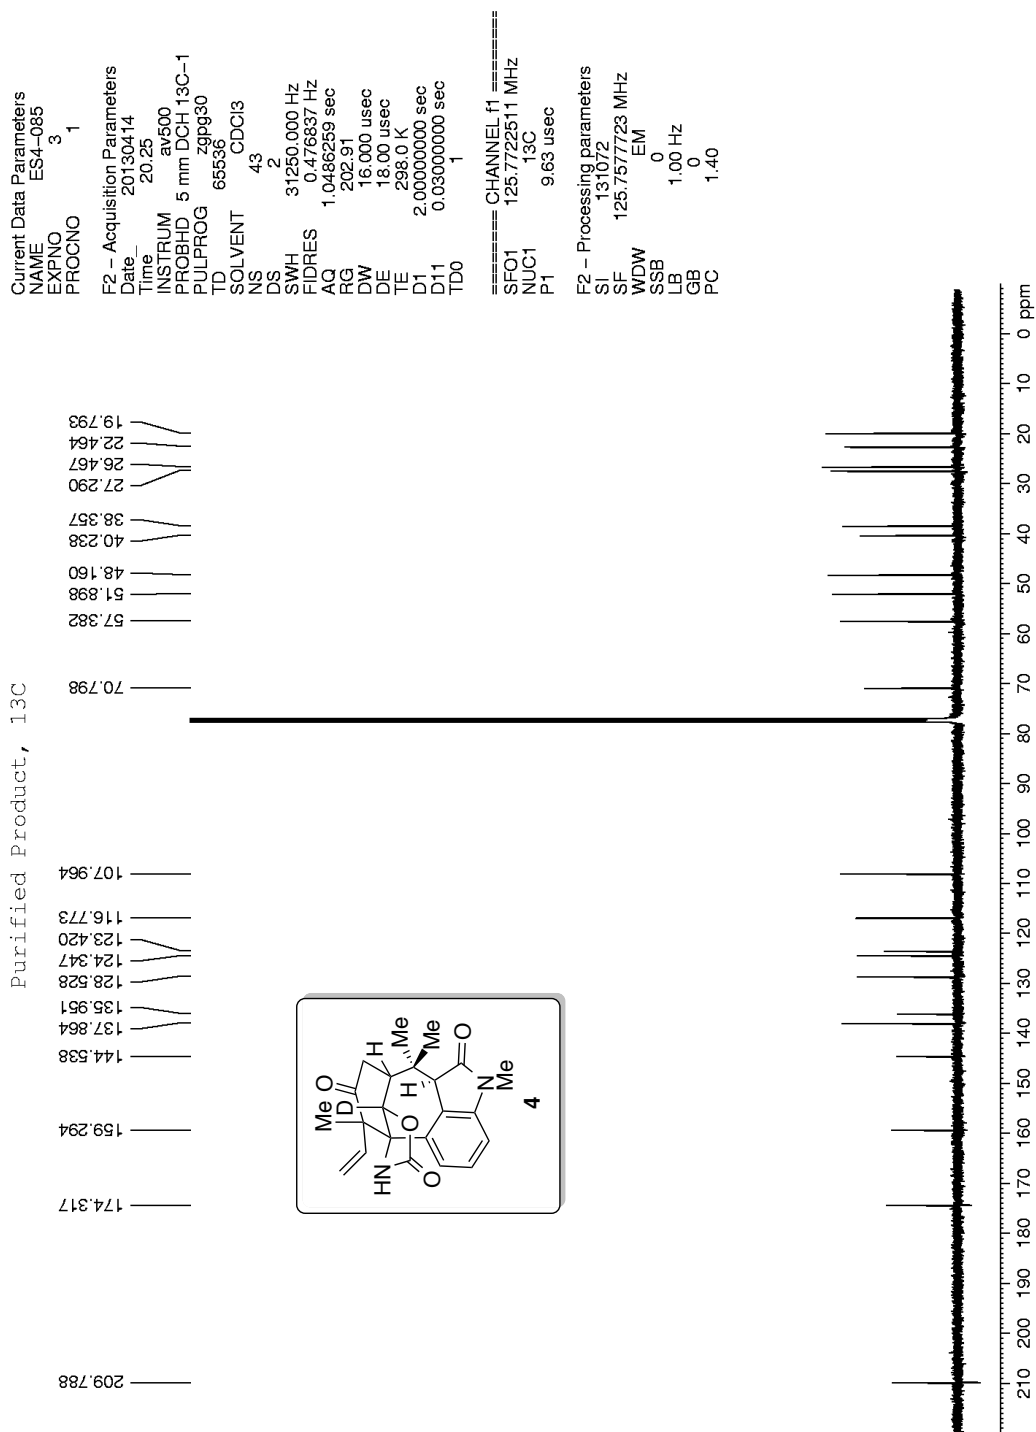



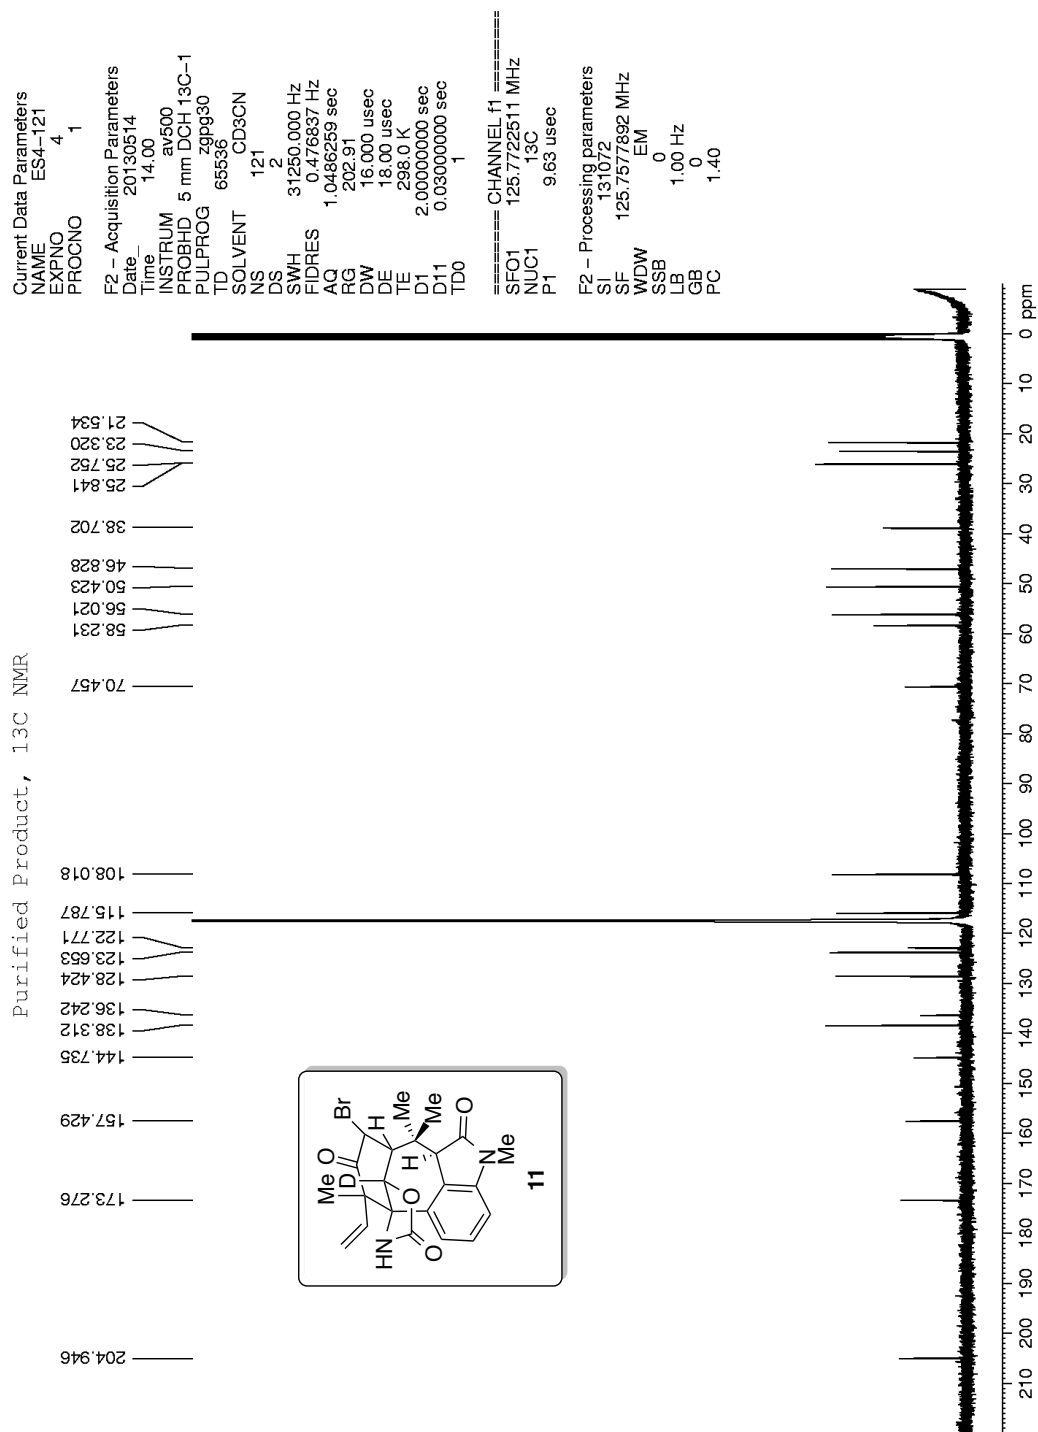

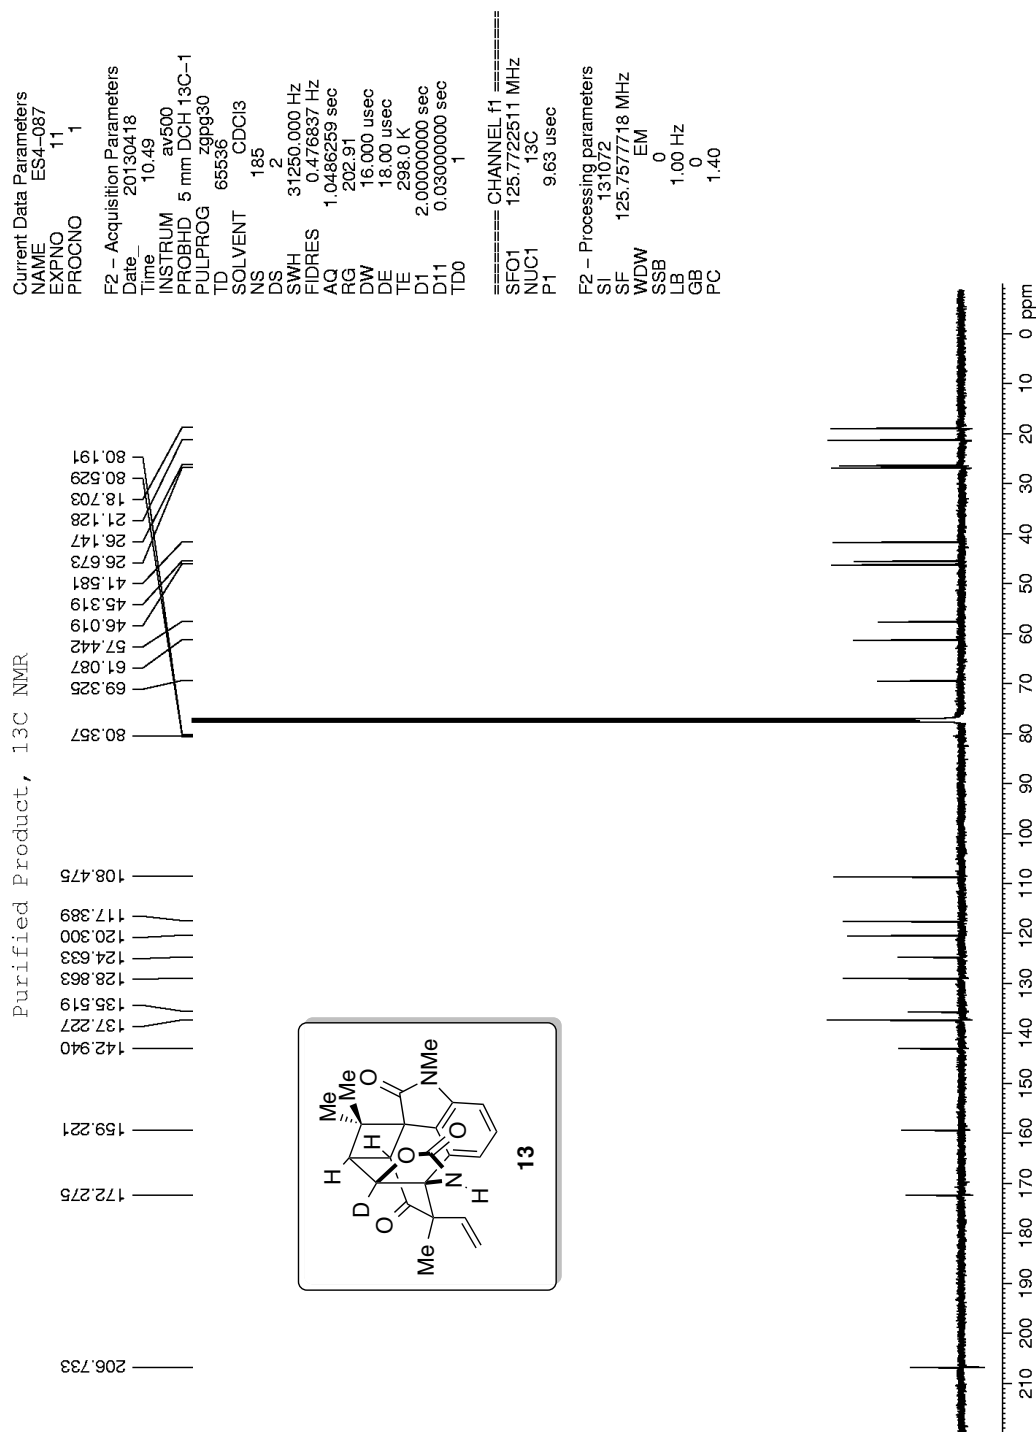

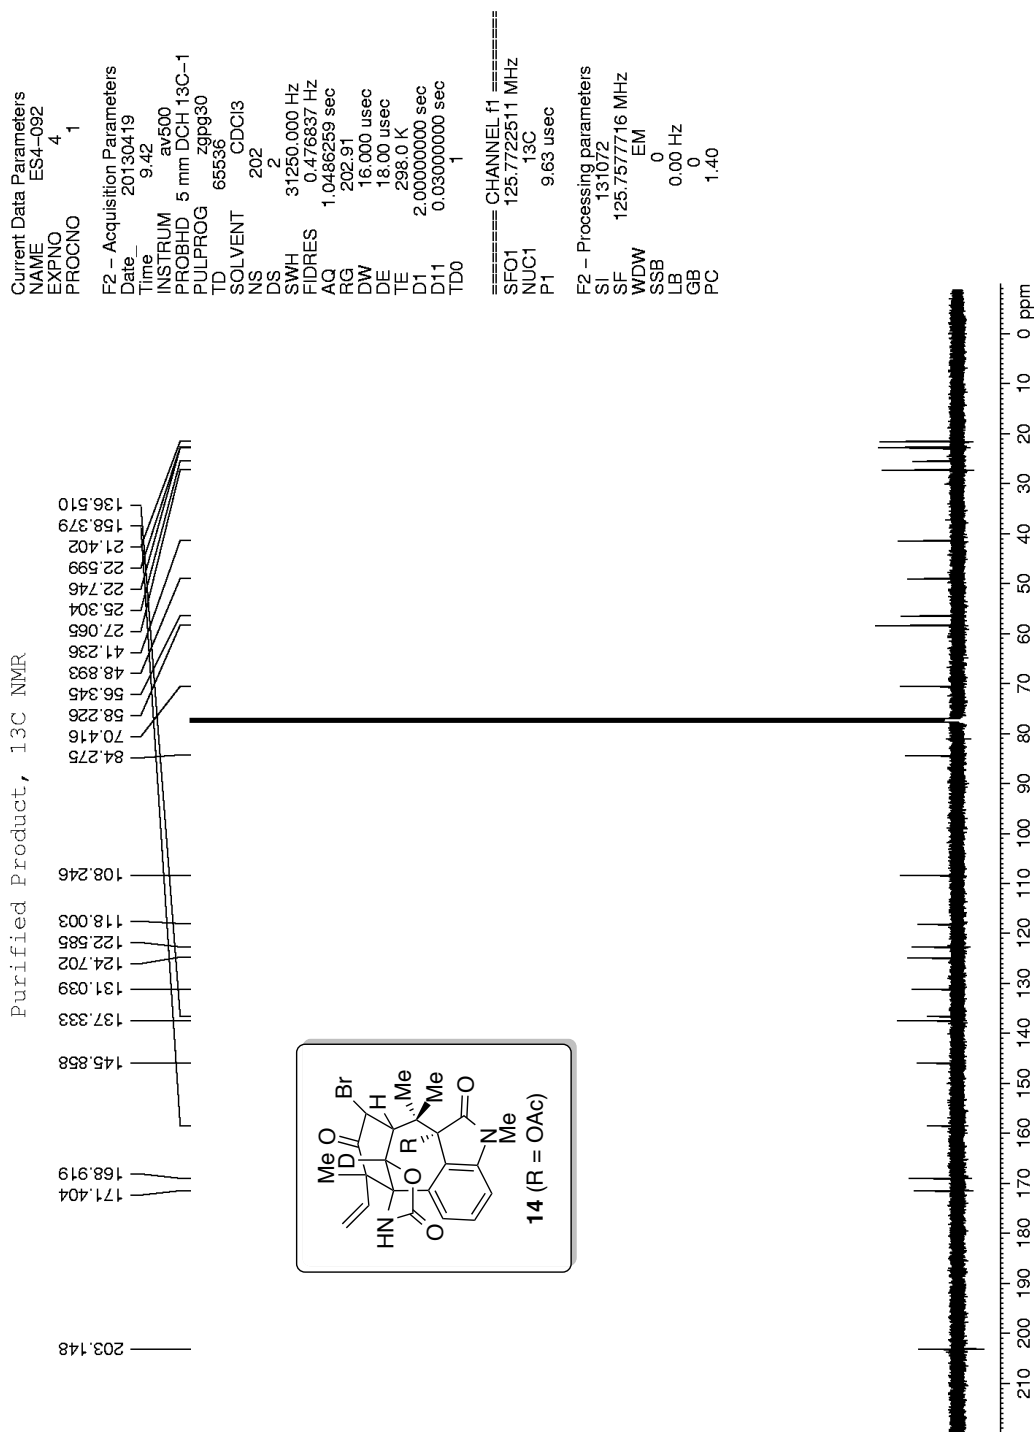

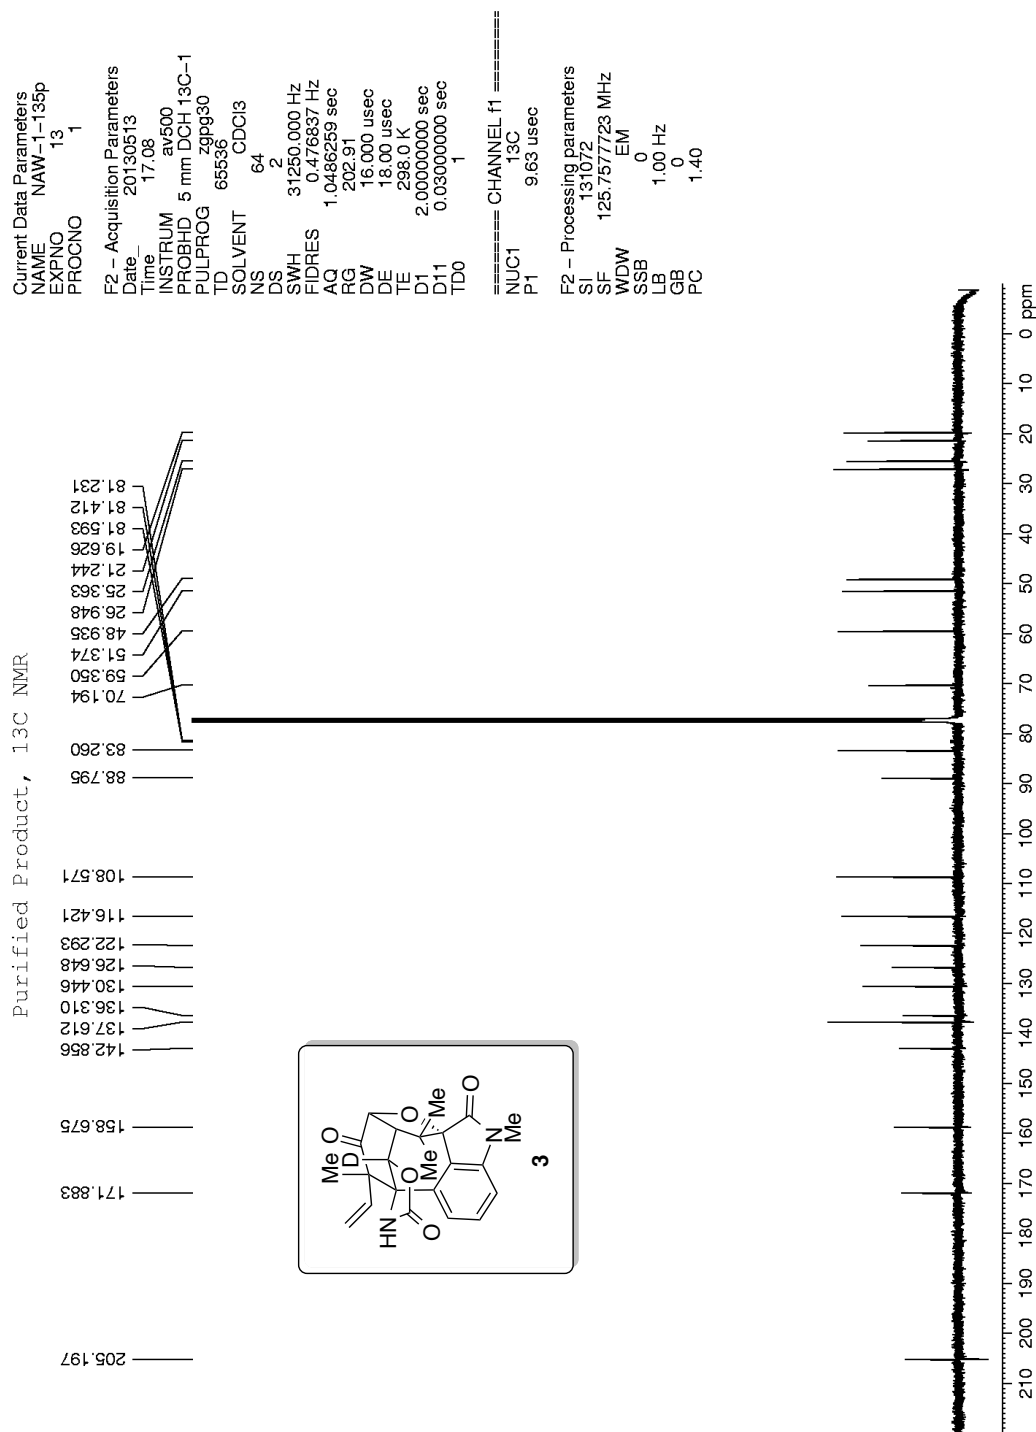

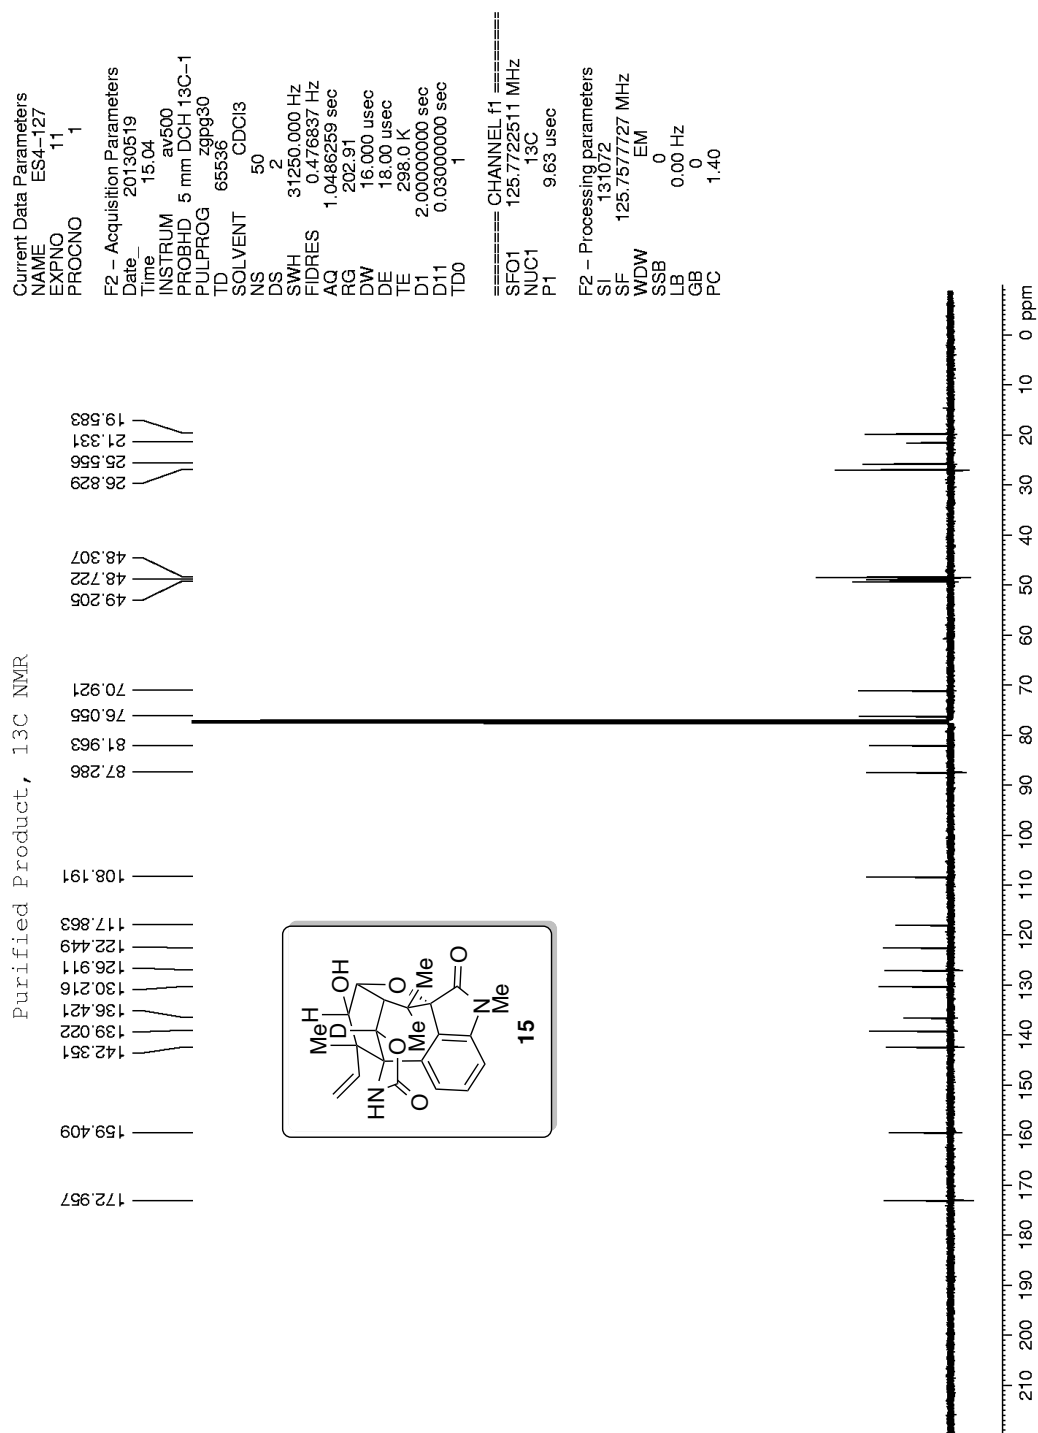

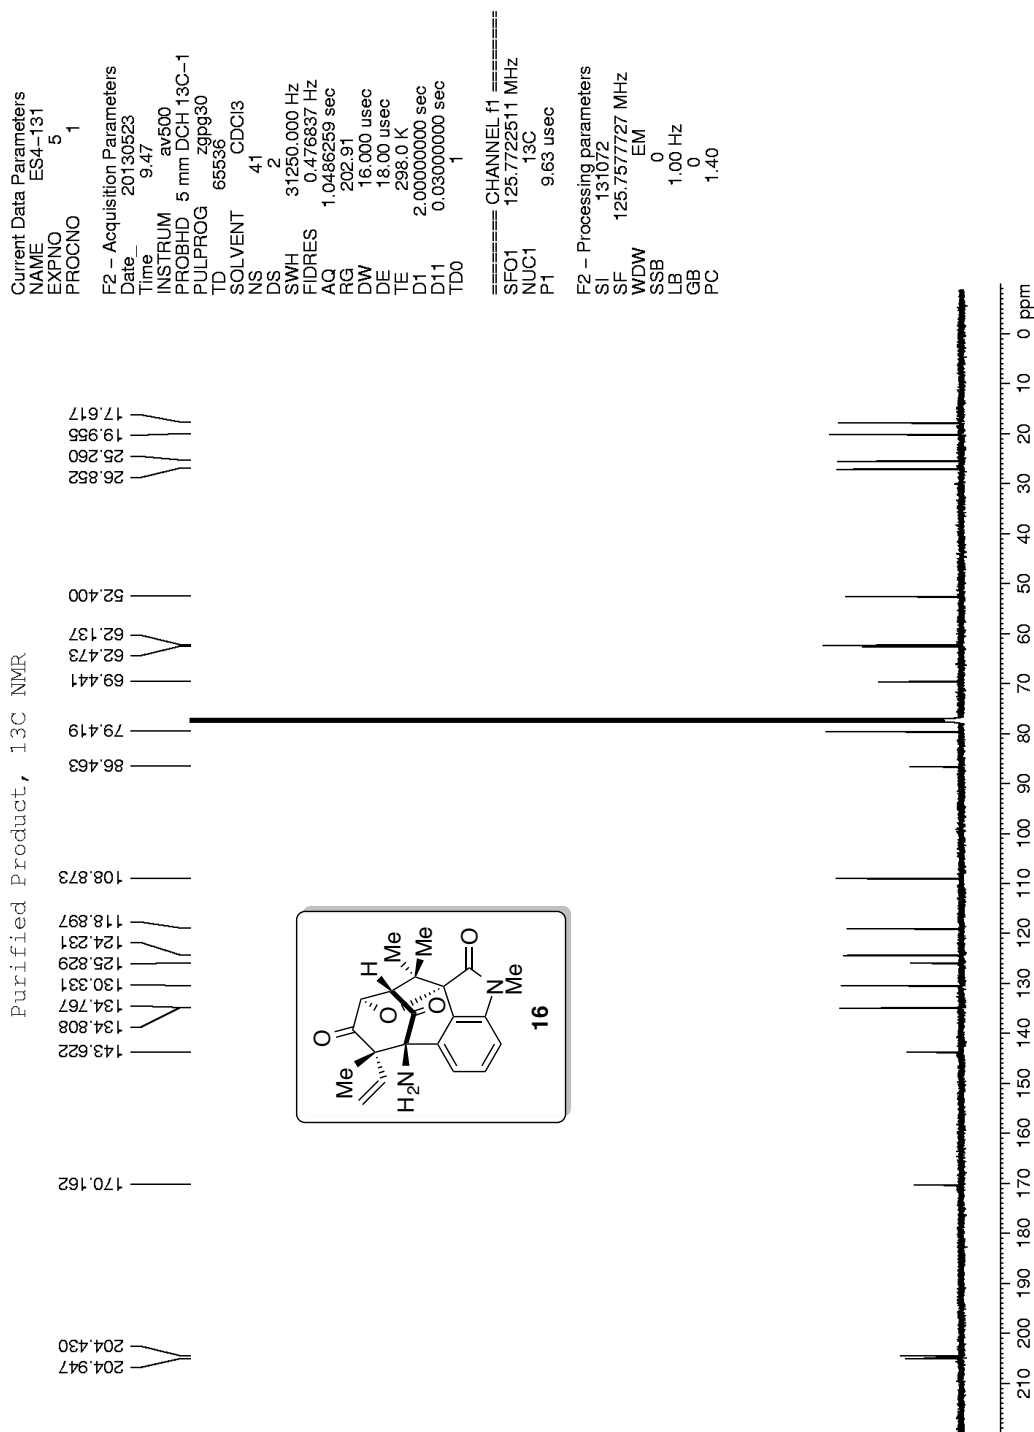

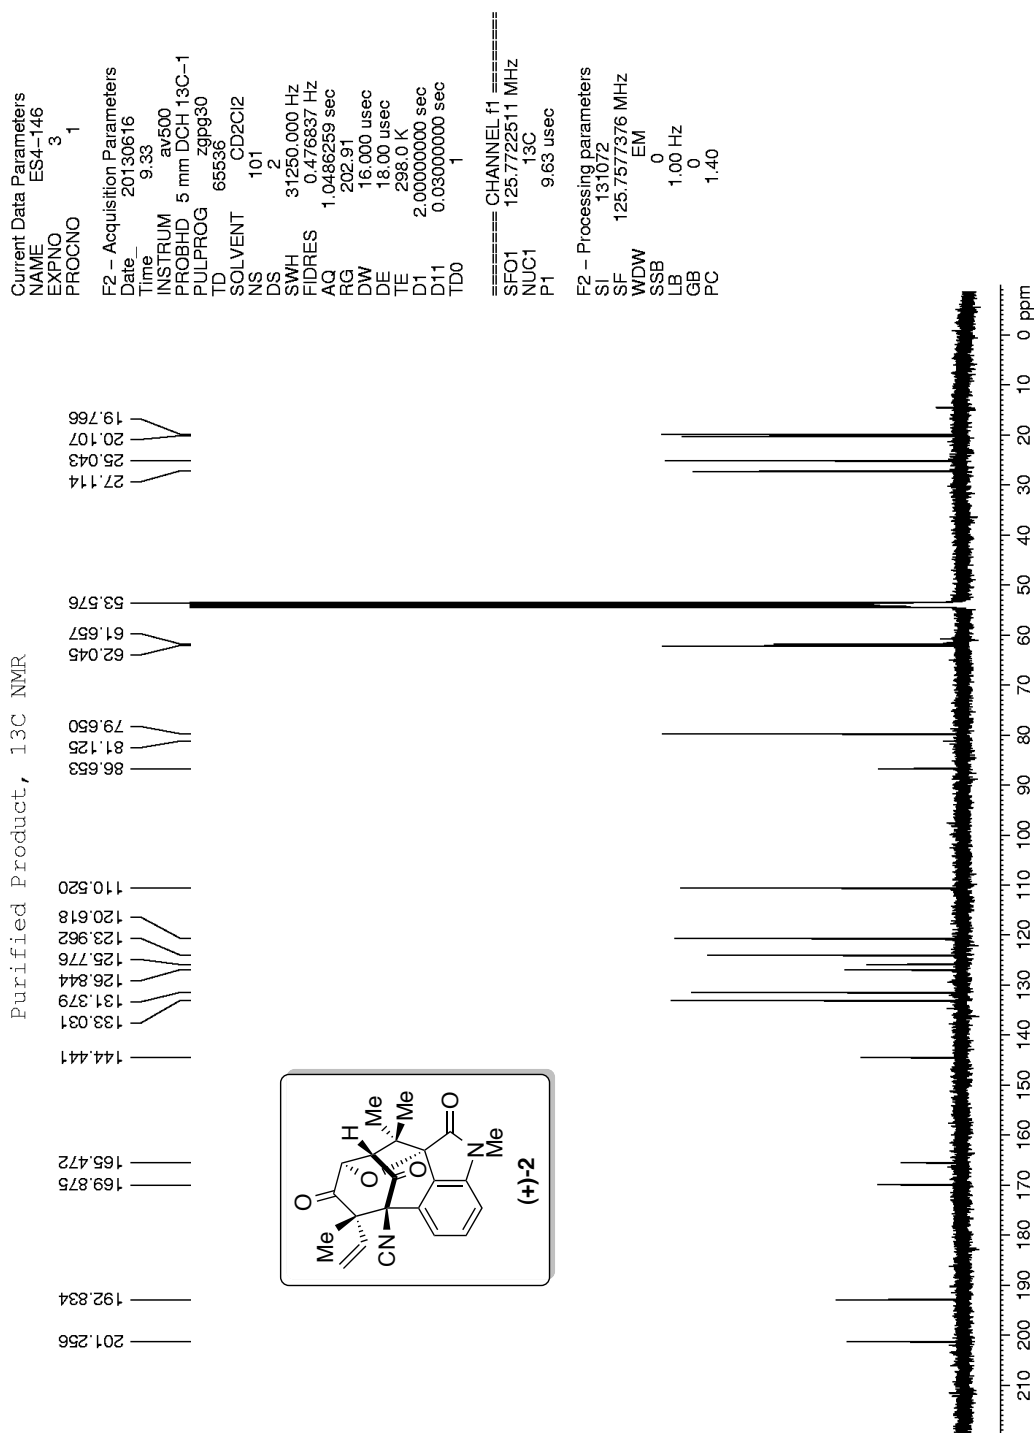

Supplement: NIHMS534454-supplement-Supporting_Information.pdf [file NIHMS534454-supplement-Supporting_Information.pdf]
